# Supplementary material for: Clinoposides A–F: meroterpenoids with protective effects on H9c2 cardiomyocyte from Clinopodium chinense
Source: Royal Society of Chemistry journal article supplement (doi:10.1039/c5ra27485k), 2016-01-01
Supplement: c5ra27485k1.pdf [file c5ra27485k1.pdf]

## Clinoposides A–F: meroterpenoids with protective effects on H9c2

### cardiomyocyte from *Clinopodium chinense*

Yin-Di Zhu,<sup>a‡</sup> Hai-Feng Wu,<sup>a‡</sup> Guo-Xu Ma,<sup>a</sup> Rong-Chang Chen,<sup>a</sup> Hai-Lin Long,<sup>b</sup> Zhi-Li Zuo,<sup>c</sup> Nai-Liang Zhu,<sup>a</sup> Bo Hou,<sup>c</sup> Xu-Dong Xu,<sup>\*a</sup> Gui-Bo Sun,<sup>\*a</sup> and Jun-Shan Yang<sup>a</sup>

<sup>a</sup>Key Laboratory of Bioactive Substances and Resources Utilization of Chinese Herbal Medicine, Ministry of Education, Institute of Medicinal Plant Development, Peking Union Medical College and Chinese Academy of Medical Sciences, Beijing 100193, P. R. China. E-mail: xdxu@implad.ac.cn; Tel./Fax: +86-10-5783-3296. E-mail: gbsun@implad.ac.cn; Tel./Fax: +86-10-6289-9735.

<sup>b</sup>State Key Laboratory of Natural and Biomimetic Drugs, School of Pharmaceutical Sciences, Peking University, Beijing 100191, P. R. China

<sup>c</sup>State Key Laboratory of Phytochemistry and Plant Resources in West China, Kunming Institute of Botany, Chinese Academy of Sciences, Kunming 650201, P. R. China

#### Table of contents

|          |                                                                                                                                     |
|----------|-------------------------------------------------------------------------------------------------------------------------------------|
| Page S4  | <b>Table S1.</b> <sup>1</sup> H and <sup>13</sup> C NMR data for <b>1</b> and <b>2</b> (600 MHz, Pyridine- <i>d</i> <sub>5</sub> ). |
| Page S5  | <b>Table S2.</b> <sup>1</sup> H and <sup>13</sup> C NMR data for <b>3</b> and <b>4</b> (600 MHz, Pyridine- <i>d</i> <sub>5</sub> ). |
| Page S7  | <b>Table S3.</b> <sup>1</sup> H and <sup>13</sup> C NMR data for <b>5</b> and <b>6</b> (600 MHz, Pyridine- <i>d</i> <sub>5</sub> ). |
| Page S10 | <b>Figure S1.</b> The HR-ESI-MS of <b>1</b> .                                                                                       |
| Page S10 | <b>Figure S2.</b> <sup>1</sup> H NMR spectrum of <b>1</b> in Pyridine- <i>d</i> <sub>5</sub> .                                      |
| Page S11 | <b>Figure S3.</b> <sup>13</sup> C APT spectrum of <b>1</b> in Pyridine- <i>d</i> <sub>5</sub> .                                     |
| Page S11 | <b>Figure S4.</b> HSQC spectrum of <b>1</b> in Pyridine- <i>d</i> <sub>5</sub> .                                                    |
| Page S12 | <b>Figure S5.</b> HSQC-TOCSY spectrum of <b>1</b> in Pyridine- <i>d</i> <sub>5</sub> .                                              |
| Page S12 | <b>Figure S6.</b> HMBC spectrum of <b>1</b> in Pyridine- <i>d</i> <sub>5</sub> .                                                    |
| Page S13 | <b>Figure S7.</b> COSY spectrum of <b>1</b> in Pyridine- <i>d</i> <sub>5</sub> .                                                    |
| Page S13 | <b>Figure S8.</b> TOCSY spectrum of <b>1</b> in Pyridine- <i>d</i> <sub>5</sub> .                                                   |
| Page S14 | <b>Figure S9.</b> COSY and HMBC correlations of <b>1</b> in Pyridine- <i>d</i> <sub>5</sub> .                                       |
| Page S14 | <b>Figure S10.</b> NOESY Spectrum of <b>1</b> in Pyridine- <i>d</i> <sub>5</sub> .                                                  |
| Page S15 | <b>Figure S11.</b> The experimental UV spectrum of <b>1</b> .                                                                       |
| Page S15 | <b>Figure S12.</b> The experimental and calculated ECD spectra of <b>1</b> .                                                        |
| Page S16 | <b>Figure S13.</b> The IR spectrum of <b>1</b> .                                                                                    |
| Page S16 | <b>Figure S14.</b> The HR-ESI-MS of <b>2</b> .                                                                                      |
| Page S17 | <b>Figure S15.</b> <sup>1</sup> H NMR spectrum of <b>2</b> in Pyridine- <i>d</i> <sub>5</sub> .                                     |
| Page S17 | <b>Figure S16.</b> <sup>13</sup> C APT spectrum of <b>2</b> in Pyridine- <i>d</i> <sub>5</sub> .                                    |
| Page S18 | <b>Figure S17.</b> HSQC spectrum of <b>2</b> in Pyridine- <i>d</i> <sub>5</sub> .                                                   |
| Page S18 | <b>Figure S18.</b> HSQC-TOCSY spectrum of <b>2</b> in Pyridine- <i>d</i> <sub>5</sub> .                                             |
| Page S19 | <b>Figure S19.</b> HMBC spectrum of <b>2</b> in Pyridine- <i>d</i> <sub>5</sub> .                                                   |
| Page S19 | <b>Figure S20.</b> COSY spectrum of <b>2</b> in Pyridine- <i>d</i> <sub>5</sub> .                                                   |
| Page S20 | <b>Figure S21.</b> TOCSY spectrum of <b>2</b> in Pyridine- <i>d</i> <sub>5</sub> .                                                  |
| Page S20 | <b>Figure S22.</b> COSY and HMBC correlations of <b>2</b> in Pyridine- <i>d</i> <sub>5</sub> .                                      |
| Page S21 | <b>Figure S23.</b> NOESY Spectrum of <b>2</b> in Pyridine- <i>d</i> <sub>5</sub> .                                                  |

|          |                                                                                                    |
|----------|----------------------------------------------------------------------------------------------------|
| Page S21 | <b>Figure S24.</b> The experimental UV spectrum of <b>2</b> .                                      |
| Page S22 | <b>Figure S25.</b> The experimental and calculated ECD spectra of <b>2</b> .                       |
| Page S22 | <b>Figure S26.</b> The IR spectrum of <b>2</b> .                                                   |
| Page S23 | <b>Figure S27.</b> The HR-ESI-MS of <b>3</b> .                                                     |
| Page S23 | <b>Figure S28.</b> <sup>1</sup> H NMR spectrum of <b>3</b> in Pyridine- <i>d</i> <sub>5</sub> .    |
| Page S24 | <b>Figure S29.</b> <sup>13</sup> C APT spectrum of <b>3</b> in Pyridine- <i>d</i> <sub>5</sub> .   |
| Page S24 | <b>Figure S30.</b> HSQC spectrum of <b>3</b> in Pyridine- <i>d</i> <sub>5</sub> .                  |
| Page S25 | <b>Figure S31.</b> HSQC-TOCSY spectrum of <b>3</b> in Pyridine- <i>d</i> <sub>5</sub> .            |
| Page S25 | <b>Figure S32.</b> HMBC spectrum of <b>3</b> in Pyridine- <i>d</i> <sub>5</sub> .                  |
| Page S26 | <b>Figure S33.</b> COSY spectrum of <b>3</b> in Pyridine- <i>d</i> <sub>5</sub> .                  |
| Page S26 | <b>Figure S34.</b> TOCSY spectrum of <b>3</b> in Pyridine- <i>d</i> <sub>5</sub> .                 |
| Page S27 | <b>Figure S35.</b> COSY and HMBC correlations of <b>3</b> in Pyridine- <i>d</i> <sub>5</sub> .     |
| Page S27 | <b>Figure S36.</b> NOESY Spectrum of <b>3</b> in Pyridine- <i>d</i> <sub>5</sub> .                 |
| Page S28 | <b>Figure S37.</b> The experiment UV spectrum of <b>3</b> .                                        |
| Page S28 | <b>Figure S38.</b> The experimental and calculated ECD spectra of <b>3</b> .                       |
| Page S29 | <b>Figure S39.</b> The IR spectrum of <b>3</b> .                                                   |
| Page S29 | <b>Figure S40.</b> The HR-ESI-MS of <b>4</b> .                                                     |
| Page S30 | <b>Figure S41.</b> <sup>1</sup> H NMR spectrum of <b>4</b> in Pyridine- <i>d</i> <sub>5</sub> .    |
| Page S30 | <b>Figure S42.</b> <sup>13</sup> C NMR T spectrum of <b>4</b> in Pyridine- <i>d</i> <sub>5</sub> . |
| Page S31 | <b>Figure S43.</b> HSQC spectrum of <b>4</b> in Pyridine- <i>d</i> <sub>5</sub> .                  |
| Page S31 | <b>Figure S44.</b> HSQC-TOCSY spectrum of <b>4</b> in Pyridine- <i>d</i> <sub>5</sub> .            |
| Page S32 | <b>Figure S45.</b> HMBC spectrum of <b>4</b> in Pyridine- <i>d</i> <sub>5</sub> .                  |
| Page S32 | <b>Figure S46.</b> COSY spectrum of <b>4</b> in Pyridine- <i>d</i> <sub>5</sub> .                  |
| Page S33 | <b>Figure S47.</b> TOCSY spectrum of <b>4</b> in Pyridine- <i>d</i> <sub>5</sub> .                 |
| Page S33 | <b>Figure S48.</b> COSY and HMBC correlations of <b>4</b> in Pyridine- <i>d</i> <sub>5</sub> .     |
| Page S34 | <b>Figure S49.</b> NOESY Spectrum of <b>4</b> in Pyridine- <i>d</i> <sub>5</sub> .                 |
| Page S34 | <b>Figure S50.</b> The experimental UV spectrum of <b>4</b> .                                      |
| Page S35 | <b>Figure S51.</b> The experimental ECD spectrum of <b>4</b> .                                     |
| Page S35 | <b>Figure S52.</b> The IR spectrum of <b>4</b> .                                                   |
| Page S36 | <b>Figure S53.</b> The HR-ESI-MS of <b>5</b> .                                                     |
| Page S36 | <b>Figure S54.</b> <sup>1</sup> H NMR spectrum of <b>5</b> in Pyridine- <i>d</i> <sub>5</sub> .    |
| Page S37 | <b>Figure S55.</b> <sup>13</sup> C APT spectrum of <b>5</b> in Pyridine- <i>d</i> <sub>5</sub> .   |
| Page S37 | <b>Figure S56.</b> HSQC spectrum of <b>5</b> in Pyridine- <i>d</i> <sub>5</sub> .                  |
| Page S38 | <b>Figure S57.</b> HSQC-TOCSY spectrum of <b>5</b> in Pyridine- <i>d</i> <sub>5</sub> .            |
| Page S38 | <b>Figure S58.</b> HMBC spectrum of <b>5</b> in Pyridine- <i>d</i> <sub>5</sub> .                  |
| Page S39 | <b>Figure S59.</b> COSY spectrum of <b>5</b> in Pyridine- <i>d</i> <sub>5</sub> .                  |
| Page S39 | <b>Figure S60.</b> TOCSY spectrum of <b>5</b> in Pyridine- <i>d</i> <sub>5</sub> .                 |
| Page S40 | <b>Figure S61.</b> COSY and HMBC correlations of <b>5</b> in Pyridine- <i>d</i> <sub>5</sub> .     |
| Page S40 | <b>Figure S62.</b> NOESY Spectrum of <b>5</b> in Pyridine- <i>d</i> <sub>5</sub> .                 |
| Page S41 | <b>Figure S63.</b> The experiment UV spectrum of <b>5</b> .                                        |
| Page S41 | <b>Figure S64.</b> The experimental and calculated ECD spectra of <b>5</b> .                       |
| Page S42 | <b>Figure S65.</b> The IR spectrum of <b>5</b> .                                                   |
| Page S42 | <b>Figure S66.</b> The HR-ESI-MS of <b>6</b> .                                                     |
| Page S43 | <b>Figure S67.</b> <sup>1</sup> H NMR spectrum of <b>6</b> in Pyridine- <i>d</i> <sub>5</sub> .    |

|          |                                                                                  |
|----------|----------------------------------------------------------------------------------|
| Page S43 | <b>Figure S68.</b> $^{13}\text{C}$ APT spectrum of <b>6</b> in Pyridine- $d_5$ . |
| Page S44 | <b>Figure S69.</b> HSQC spectrum of <b>6</b> in Pyridine- $d_5$ .                |
| Page S44 | <b>Figure S70.</b> HSQC-TOCSY spectrum of <b>6</b> in Pyridine- $d_5$ .          |
| Page S45 | <b>Figure S71.</b> HMBC spectrum of <b>6</b> in Pyridine- $d_5$ .                |
| Page S45 | <b>Figure S72.</b> COSY spectrum of <b>6</b> in Pyridine- $d_5$ .                |
| Page S46 | <b>Figure S73.</b> TOCSY spectrum of <b>6</b> in Pyridine- $d_5$ .               |
| Page S46 | <b>Figure S74.</b> COSY and HMBC correlations of <b>6</b> in Pyridine- $d_5$ .   |
| Page S47 | <b>Figure S75.</b> NOESY Spectrum of <b>6</b> in Pyridine- $d_5$ .               |
| Page S47 | <b>Figure S76.</b> The experimental UV spectrum of <b>6</b> .                    |
| Page S48 | <b>Figure S77.</b> The experimental and calculated ECD spectra of <b>6</b> .     |
| Page S48 | <b>Figure S78.</b> The IR spectrum of <b>6</b> .                                 |
| Page S49 | <b>Figure S79.</b> LC-ESI(-)MS chromatogram of methanol extract.                 |

**Table S1. <sup>1</sup>H and <sup>13</sup>C NMR Data for 1 and 2 (600 MHz, pyridine-*d*<sub>5</sub>)**

| position | 1                     |                                          | 2                     |                                          |
|----------|-----------------------|------------------------------------------|-----------------------|------------------------------------------|
|          | $\delta_C$ , type     | $\delta_H$ ( <i>J</i> in Hz)             | $\delta_C$ , type     | $\delta_H$ ( <i>J</i> in Hz)             |
| 1        | 39.9, CH <sub>2</sub> | 1.50, br d, (12.6)<br>2.00, m            | 39.7, CH <sub>2</sub> | 1.60, m<br>1.94, br d, (13.2)            |
| 2        | 26.7, CH <sub>2</sub> | 2.06, br t, (12.6)<br>2.12, m            | 26.8, CH <sub>2</sub> | 2.03, m<br>2.20, m                       |
| 3        | 83.6, CH              | 4.25, br t, (12.6)                       | 84.4, CH              | 4.25, m                                  |
| 4        | 44.7, C               |                                          | 44.4, C               |                                          |
| 5        | 49.1, CH              | 1.79, br d, (10.8)                       | 49.2, CH              | 1.68, br d, (11.4)                       |
| 6        | 19.0, CH <sub>2</sub> | 1.42, m<br>1.81, m                       | 19.0, CH <sub>2</sub> | 1.43, br d, (11.4)<br>1.70, m            |
| 7        | 34.9, CH <sub>2</sub> | 1.49, m<br>1.90, m                       | 34.8, CH <sub>2</sub> | 1.32, m<br>1.52, m                       |
| 8        | 41.7, C               |                                          | 41.5, C               |                                          |
| 9        | 48.5, CH              | 3.14, d, (10.8)                          | 48.7, CH              | 2.81, d, (11.4)                          |
| 10       | 39.9, C               |                                          | 39.9, C               |                                          |
| 11       | 32.8, CH              | 4.57, dd, (10.8, 1.8)                    | 33.2, CH              | 4.65, dd, (10.8, 1.8)                    |
| 12       | 128.2, CH             | 5.28 d, (1.8)                            | 128.5, CH             | 5.24, d, (2.4)                           |
| 13       | 141.6, C              |                                          | 141.8, C              |                                          |
| 14       | 44.4, C               |                                          | 44.4, C               |                                          |
| 15       | 37.9, CH <sub>2</sub> | 1.81, m<br>2.32, br t, (12.6)            | 37.6, CH <sub>2</sub> | 1.54, m<br>2.16, m                       |
| 16       | 67.3, CH              | 4.71, m                                  | 67.2, CH              | 4.45, m                                  |
| 17       | 43.5, C               |                                          | 43.3, C               |                                          |
| 18       | 45.0, CH              | 2.49, dd, (13.8, 4.2)                    | 45.0, CH              | 2.35, dd, (13.8, 4.2)                    |
| 19       | 47.4, CH <sub>2</sub> | 1.35, br d, (11.4)<br>1.81, m            | 47.4, CH <sub>2</sub> | 1.32, m<br>1.79, br t, (13.8)            |
| 20       | 31.5, C               |                                          | 31.7, C               |                                          |
| 21       | 35.0, CH <sub>2</sub> | 1.29, br d, (11.4)<br>1.66, br t, (11.4) | 34.8, CH <sub>2</sub> | 1.26, br d, (11.4)<br>1.57, br t, (11.4) |
| 22       | 26.5, CH <sub>2</sub> | 1.80, m<br>2.84, d, (12.6)               | 26.6, CH <sub>2</sub> | 1.73, m<br>2.78, br d, (12.6)            |
| 23       | 65.8, CH <sub>2</sub> | 3.74, d, (10.2)<br>4.35, d, (10.2)       | 66.5, CH <sub>2</sub> | 3.76, d, (10.8)<br>4.33, d, (10.8)       |
| 24       | 13.9, CH <sub>3</sub> | 1.13, s                                  | 13.8, CH <sub>3</sub> | 1.13, s                                  |
| 25       | 17.8, CH <sub>3</sub> | 1.52, s                                  | 17.7, CH <sub>3</sub> | 1.48, s                                  |
| 26       | 18.8, CH <sub>3</sub> | 1.42, s                                  | 19.0, CH <sub>3</sub> | 1.34, s                                  |
| 27       | 25.7, CH <sub>3</sub> | 1.77, s                                  | 25.9, CH <sub>3</sub> | 0.96, s                                  |
| 28       | 69.3, CH <sub>2</sub> | 3.77, d, (10.2)<br>4.52, d, (10.2)       | 69.6, CH <sub>2</sub> | 3.63, d, (10.8)<br>4.43, d, (10.8)       |
| 29       | 33.8, CH <sub>3</sub> | 0.82, s                                  | 34.0, CH <sub>3</sub> | 1.08, s                                  |
| 30       | 24.3, CH <sub>3</sub> | 0.92, s                                  | 24.4, CH <sub>3</sub> | 1.01, s                                  |
| 2'       | 79.8, CH              | 5.21, dd, (13.8, 2.4)                    | 80.6, CH              | 5.35, dd, (12.6, 3.6)                    |

|        |                       |                                                 |                       |                                                 |
|--------|-----------------------|-------------------------------------------------|-----------------------|-------------------------------------------------|
| 3'     | 44.0, CH <sub>2</sub> | 2.74, dd, (16.8, 2.4)<br>3.23, dd, (16.8, 13.8) | 45.0, CH <sub>2</sub> | 2.71, dd, (16.8, 3.6)<br>3.17, dd, (16.8, 12.6) |
| 4'     | 196.9, C              |                                                 | 197.3, C              |                                                 |
| 5'     | 162.1, C              |                                                 | 163.2, C              |                                                 |
| 6'     | 96.8, CH              | 6.18, s                                         | 97.3, CH              | 6.48, s                                         |
| 7'     | 167.6, C              |                                                 | 165.4, C              |                                                 |
| 8'     | 115.3, C              |                                                 | 114.8, C              |                                                 |
| 9'     | 161.5, C              |                                                 | 162.7, C              |                                                 |
| 10'    | 103.1, CH             |                                                 | 103.9, CH             |                                                 |
| 1''    | 130.4, C              |                                                 | 130.8, C              |                                                 |
| 2''    | 128.7, CH             | 7.49, d, (8.4)                                  | 130.1, CH             | 7.54, d, (8.4)                                  |
| 3''    | 119.0, CH             | 7.19, d, (8.4)                                  | 116.9, CH             | 7.26, d, (8.4)                                  |
| 4''    | 159.9, C              |                                                 | 160.0, C              |                                                 |
| 5''    | 119.0, CH             | 7.19, d, (8.4)                                  | 116.9, CH             | 7.26, d, (8.4)                                  |
| 6''    | 128.7, CH             | 7.49, d, (8.4)                                  | 130.1, CH             | 7.54, d, (8.4)                                  |
| 1'''   | 104.0, CH             | 4.73, d, (7.8)                                  | 104.1, CH             | 4.81, d, (7.8)                                  |
| 2'''   | 77.3, CH              | 4.55, m                                         | 77.1, CH              | 4.58, dd, (9.6, 7.8)                            |
| 3'''   | 85.5, CH              | 4.02, dd, (9.6, 2.4)                            | 85.5, CH              | 4.00, dd, (9.6, 3.0)                            |
| 4'''   | 72.3, CH              | 4.15, d, (2.4)                                  | 72.2, CH              | 4.09, d, (3.0)                                  |
| 5'''   | 70.8, CH              | 3.43, q, (6.6)                                  | 70.8, CH              | 3.28, q, (6.0)                                  |
| 6'''   | 17.4, CH <sub>3</sub> | 1.08, d, (6.6)                                  | 17.4, CH <sub>3</sub> | 1.03, d, (6.0)                                  |
| 1''''  | 104.0, CH             | 5.57, d, (7.8)                                  | 104.3, CH             | 5.57, d, (7.8)                                  |
| 2''''  | 76.6, CH              | 4.07, m                                         | 76.5, CH              | 4.11, m                                         |
| 3''''  | 79.2, CH              | 4.19, br t, (9.0)                               | 79.2, CH              | 4.17, br t, (9.0)                               |
| 4''''  | 72.5, CH              | 4.18, br t, (9.0)                               | 72.3, CH              | 4.17, br t, (9.0)                               |
| 5''''  | 77.9, CH              | 3.56, m                                         | 77.9, CH              | 3.58, m                                         |
| 6''''  | 63.4, CH <sub>2</sub> | 4.28, m<br>4.30, m                              | 63.4, CH <sub>2</sub> | 4.28, m<br>4.28, m                              |
| 1''''' | 105.5, CH             | 5.25, d, (7.8)                                  | 105.5, CH             | 5.23, d, (7.8)                                  |
| 2''''' | 75.7, CH              | 3.97, br t, (8.4)                               | 75.7, CH              | 3.97, br t, (7.8)                               |
| 3''''' | 78.8, CH              | 4.23, br t, (9.6)                               | 78.8, CH              | 4.22, br t, (9.0)                               |
| 4''''' | 72.0, CH              | 4.21, br t, (9.6)                               | 72.0, CH              | 4.21, br t, (9.0)                               |
| 5''''' | 78.9, CH              | 3.91, m                                         | 78.9, CH              | 3.89, m                                         |
| 6''''' | 63.0, CH <sub>2</sub> | 4.30, m<br>4.42, dd, (10.2, 2.4)                | 62.9, CH <sub>2</sub> | 4.30, (12.6, 5.4)<br>4.41, dd, (12.6, 3.0)      |

**Table S2. <sup>1</sup>H and <sup>13</sup>C NMR Data for 3 and 4 (600 MHz, pyridine-*d*<sub>5</sub>)**

| position | 3                     |                              | 4                     |                              |
|----------|-----------------------|------------------------------|-----------------------|------------------------------|
|          | $\delta_C$ , type     | $\delta_H$ ( <i>J</i> in Hz) | $\delta_C$ , type     | $\delta_H$ ( <i>J</i> in Hz) |
| 1        | 39.9, CH <sub>2</sub> | 1.52, br d, (12.6)           | 39.7, CH <sub>2</sub> | 1.56, br d, (12.6)           |
|          |                       | 1.96, m                      |                       | 1.95, br d, (12.6)           |
| 2        | 26.5, CH <sub>2</sub> | 1.99, m                      | 26.7, CH <sub>2</sub> | 2.03, br t, (12.6)           |
|          |                       | 2.05, m                      |                       | 2.18, m                      |
| 3        | 83.6, CH              | 4.06, m                      | 84.1, CH              | 4.25, m                      |

|    |                       |                        |                       |                        |
|----|-----------------------|------------------------|-----------------------|------------------------|
| 4  | 44.7, C               |                        | 44.4, C               |                        |
| 5  | 49.1, CH              | 1.79, m                | 49.1, CH              | 1.69, br d, (10.8)     |
| 6  | 18.7, CH <sub>2</sub> | 1.44, m                | 19.0, CH <sub>2</sub> | 1.43, br t, (12.6)     |
|    |                       | 1.86, m                |                       | 1.73, m                |
| 7  | 35.0, CH <sub>2</sub> | 1.52, m                | 34.8, CH <sub>2</sub> | 1.30, m                |
|    |                       | 1.89, m                |                       | 1.64, br t, (12.6)     |
| 8  | 41.7, C               |                        | 41.6, C               |                        |
| 9  | 48.4, CH              | 3.16, d, (10.8)        | 48.8, CH              | 2.79, d, (10.8)        |
| 10 | 39.9, C               |                        | 39.9, C               |                        |
| 11 | 32.8, CH              | 4.57, dd, (10.8, 1.8)  | 33.2, CH              | 4.64, dd, (10.8, 1.8)  |
| 12 | 128.6, CH             | 5.29, d, (1.8)         | 128.5, CH             | 5.24 d, (2.4)          |
| 13 | 141.6, C              |                        | 141.8, C              |                        |
| 14 | 44.3, C               |                        | 44.4, C               |                        |
| 15 | 37.9, CH <sub>2</sub> | 1.83, m                | 37.6, CH <sub>2</sub> | 1.56, br d, (12.6)     |
|    |                       | 2.32, br t, (12.6)     |                       | 2.16, br t, (12.6)     |
| 16 | 67.3, CH              | 4.69, m                | 67.1, CH              | 4.41, m                |
| 17 | 43.5, CH <sub>2</sub> |                        | 43.4, CH <sub>2</sub> |                        |
| 18 | 45.1, CH              | 2.48, dd, (13.8, 4.2)  | 44.5, CH              | 2.36, dd, (13.8, 4.2)  |
| 19 | 47.4, CH <sub>2</sub> | 1.37, br d, (10.8)     | 47.6, CH <sub>2</sub> | 1.29, m                |
|    |                       | 1.97, m                |                       | 1.75, m                |
| 20 | 31.5, C               |                        | 31.7, C               |                        |
| 21 | 34.9, CH <sub>2</sub> | 1.29, br d, (11.4)     | 34.8, CH <sub>2</sub> | 1.27, m                |
|    |                       | 1.66, br t, (11.4)     |                       | 1.54, m                |
| 22 | 26.5, CH <sub>2</sub> | 1.79, m                | 26.6, CH <sub>2</sub> | 1.77, m                |
|    |                       | 2.84, br d, (12.6)     |                       | 2.77, br d, (11.4)     |
| 23 | 65.8, CH <sub>2</sub> | 3.74, d, (10.2)        | 66.2, CH <sub>2</sub> | 3.76, d, (10.2)        |
|    |                       | 4.42, d, (10.2)        |                       | 4.34, d, (10.2)        |
| 24 | 13.8, CH <sub>3</sub> | 1.22, s                | 13.9, CH <sub>3</sub> | 1.12, s                |
| 25 | 17.8, CH <sub>3</sub> | 1.50, s                | 17.7, CH <sub>3</sub> | 1.47, s                |
| 26 | 18.7, CH <sub>3</sub> | 1.41, s                | 18.8, CH <sub>3</sub> | 1.34, s                |
| 27 | 25.7, CH <sub>3</sub> | 1.77, s                | 26.0, CH <sub>3</sub> | 0.93, s                |
| 28 | 69.4, CH <sub>2</sub> | 3.77, d, (10.2)        | 69.5, CH <sub>2</sub> | 3.63, d, (10.2)        |
|    |                       | 4.52, d, (10.2)        |                       | 4.43, d, (10.2)        |
| 29 | 33.8, CH <sub>2</sub> | 0.83, s                | 34.1, CH <sub>3</sub> | 1.12, s                |
| 30 | 24.3, CH <sub>2</sub> | 0.91, s                | 24.4, CH <sub>3</sub> | 1.01, s                |
| 2' | 80.3, CH              | 5.37, dd, (13.8, 2.4)  | 80.3, CH              | 5.38, dd, (12.6, 3.6)  |
| 3' | 43.9, CH <sub>2</sub> | 2.74, dd, (16.8, 2.4)  | 45.0, CH <sub>2</sub> | 2.70, dd, (16.8, 3.6)  |
|    |                       | 3.06, dd, (16.8, 13.8) |                       | 3.10, dd, (16.8, 12.6) |
| 4' | 197.1, C              |                        | 197.0, C              |                        |
| 5' | 162.2, C              |                        | 162.5, C              |                        |
| 6' | 97.0, CH              | 6.25, s                | 97.4, CH              | 6.51, s                |
| 7' | 167.5, C              |                        | 165.5, C              |                        |
| 8' | 115.5, C              |                        | 114.9, C              |                        |
| 9' | 161.5, C              |                        | 161.0, C              |                        |

|                  |                        |                       |                       |                       |
|------------------|------------------------|-----------------------|-----------------------|-----------------------|
| 10'              | 103.2, C               |                       | 103.9, C              |                       |
| 1''              | 130.4, C               |                       | 132.4, C              |                       |
| 2''              | 129.3, CH              | 7.46, d, (8.4)        | 128.5, CH             | 7.50, d, (8.4)        |
| 3''              | 116.9, CH              | 7.16, d, (8.4)        | 114.9, CH             | 7.11, d, (8.4)        |
| 4''              | 160.0, C               |                       | 161.0, C              |                       |
| 5''              | 116.9, CH              | 7.16, d, (8.4)        | 114.9, CH             | 7.11, d, (8.4)        |
| 6''              | 129.3, CH              | 7.46, d, (8.4)        | 128.5, CH             | 7.50, d, (8.4)        |
| 1'''             | 104.0, CH <sub>2</sub> | 4.71, d, (7.8)        | 104.0, CH             | 4.82, d, (7.8)        |
| 2'''             | 77.3, CH               | 4.55, br d, (9.6)     | 77.2, CH              | 4.59, dd, (9.6, 7.8)  |
| 3'''             | 85.5, CH               | 4.02, dd, (9.6, 2.4)  | 85.6, CH              | 4.02, dd, (9.6, 3.0)  |
| 4'''             | 72.3, CH               | 4.13, d, (2,4)        | 72.2, CH              | 4.12, d, (2,4)        |
| 5'''             | 70.8, CH               | 3.40, q, (6.6)        | 70.8, CH              | 3.32, q, (6.6)        |
| 6'''             | 17.4, CH <sub>3</sub>  | 1.03, d, (6.6)        | 17.4, CH <sub>3</sub> | 1.06, d, (6.6)        |
| 1''''            | 104.3, CH              | 5.56, d, (7.8)        | 104.3, CH             | 5.57, d, (7.8)        |
| 2''''            | 76.5, CH <sub>2</sub>  | 4.06, m               | 76.5, CH              | 4.08, br t, (7.8)     |
| 3''''            | 79.2, CH               | 4.19, br t, (9.0)     | 79.3, CH              | 4.18, m               |
| 4''''            | 72.4, CH               | 4.17, br t, (9.6)     | 72.3, CH              | 4.17, m               |
| 5''''            | 77.9, CH               | 3.56, m               | 77.9, CH              | 3.59, m               |
| 6''''            | 63.4, CH <sub>2</sub>  | 4.28, m               | 63.4, CH <sub>2</sub> | 4.28, m               |
|                  |                        | 4.28, m               |                       | 4.28, m               |
| 1'''''           | 105.5, CH              | 5.24, d, (7.8)        | 105.5, CH             | 5.23, d, (7.8)        |
| 2'''''           | 75.7, CH               | 3.97, br t, (7.8)     | 75.8, CH              | 3.98, br t, (7.8)     |
| 3'''''           | 78.8, CH               | 4.24, br t, (9.0)     | 78.8, CH              | 4.21, m               |
| 4'''''           | 72.0, CH               | 4.22, br t, (9.0)     | 72.0, CH              | 4.20, m               |
| 5'''''           | 78.9, CH               | 3.91, m               | 78.9, CH              | 3.90, m               |
| 6'''''           | 63.0, CH <sub>2</sub>  | 4.30, m               | 63.0, CH <sub>2</sub> | 4.30, dd, (10.2, 5.4) |
|                  |                        | 4.42, dd, (10.2, 2.4) |                       | 4.41, dd, (10.2, 2.4) |
| OCH <sub>3</sub> |                        |                       | 55.9, CH <sub>3</sub> | 3.76                  |

**Table S3. <sup>1</sup>H and <sup>13</sup>C NMR Data for 5 and 6 (600 MHz, pyridine-*d*<sub>5</sub>)**

| position | 5                     |                              | 6                     |                              |
|----------|-----------------------|------------------------------|-----------------------|------------------------------|
|          | $\delta_C$ , type     | $\delta_H$ ( <i>J</i> in Hz) | $\delta_C$ , type     | $\delta_H$ ( <i>J</i> in Hz) |
| 1        | 39.7, CH <sub>2</sub> | 1.48, m                      | 39.7, CH <sub>2</sub> | 1.53, m                      |
|          |                       | 1.95, m                      |                       | 1.93, m                      |
| 2        | 26.7, CH <sub>2</sub> | 1.97, m                      | 26.8, CH <sub>2</sub> | 2.02, m                      |
|          |                       | 2.03, m                      |                       | 2.10, m                      |
| 3        | 83.5, CH              | 4.05, m                      | 83.3, CH              | 4.13, dd, (12.6, 4.8)        |
| 4        | 44.7, C               |                              | 44.5, C               |                              |
| 5        | 49.1, CH              | 1.77, m                      | 48.9, CH              | 1.84, m                      |
| 6        | 19.0, CH <sub>2</sub> | 1.51, m                      | 18.8, CH <sub>2</sub> | 1.53, m                      |
|          |                       | 1.81, m                      |                       | 1.82, m                      |
| 7        | 34.9, CH <sub>2</sub> | 1.53, m                      | 34.9, CH <sub>2</sub> | 1.65, br t, (12.6)           |
|          |                       | 1.86, m                      |                       | 1.95, m                      |
| 8        | 41.7, C               |                              | 41.7, C               |                              |

|     |                       |                                                 |                       |                                                 |
|-----|-----------------------|-------------------------------------------------|-----------------------|-------------------------------------------------|
| 9   | 48.1, CH              | 3.19, d, (10.8)                                 | 48.0, CH              | 3.20, d, (11.4)                                 |
| 10  | 40.0, C               |                                                 | 40.0, C               |                                                 |
| 11  | 33.2, CH              | 4.70, dd, (10.8, 1.8)                           | 33.2, CH              | 4.56, dd, (10.8, 1.8)                           |
| 12  | 128.1, CH             | 5.39 d, (2.4)                                   | 128.5, CH             | 5.39, d, (2.4)                                  |
| 13  | 141.9, C              |                                                 | 141.8, C              |                                                 |
| 14  | 45.2, C               |                                                 | 45.1, C               |                                                 |
| 15  | 37.9, CH <sub>2</sub> | 1.84, m<br>2.34, br t, (12.6)                   | 37.6, CH <sub>2</sub> | 1.83, m<br>2.34, br t, (12.6)                   |
| 16  | 67.3, CH              | 4.77, m                                         | 67.2, CH              | 4.74, m                                         |
| 17  | 43.5, C               |                                                 | 43.5, C               |                                                 |
| 18  | 45.2, CH              | 2.48, dd, (12.6, 4.2)                           | 45.1, CH              | 2.47, dd, (13.2, 4.2)                           |
| 19  | 47.1, CH <sub>2</sub> | 1.50, m<br>2.09, br t, (13.8)                   | 47.4, CH <sub>2</sub> | 1.44, m<br>2.08, m                              |
| 20  | 31.5, C               |                                                 | 31.5, C               |                                                 |
| 21  | 34.9, CH <sub>2</sub> | 1.29, m<br>1.66, br t, (11.4)                   | 34.9, CH <sub>2</sub> | 1.29, m<br>1.53, m                              |
| 22  | 26.5, CH <sub>2</sub> | 1.82, m<br>2.84, d, (13.8)                      | 26.6, CH <sub>2</sub> | 1.78, m<br>2.84, br d, (11.4)                   |
| 23  | 66.0, CH <sub>2</sub> | 3.75, d, (10.8)<br>4.35, d, (10.8)              | 65.6, CH <sub>2</sub> | 3.77, d, (10.8)<br>4.39, d, (10.8)              |
| 24  | 13.8, CH <sub>3</sub> | 1.11, s                                         | 13.8, CH <sub>3</sub> | 1.12, s                                         |
| 25  | 17.8, CH <sub>3</sub> | 1.51, s                                         | 17.8, CH <sub>3</sub> | 1.51, s                                         |
| 26  | 18.8, CH <sub>3</sub> | 1.43, s                                         | 18.7, CH <sub>3</sub> | 1.44, s                                         |
| 27  | 26.0, CH <sub>3</sub> | 1.83, s                                         | 25.9, CH <sub>3</sub> | 1.82, s                                         |
| 28  | 69.6, CH <sub>2</sub> | 3.74, d, (10.8)<br>4.55, d, (10.8)              | 69.6, CH <sub>2</sub> | 3.74, d, (10.8)<br>4.54, d, (10.8)              |
| 29  | 33.9, CH <sub>3</sub> | 0.85, s                                         | 33.9, CH <sub>3</sub> | 0.82, s                                         |
| 30  | 24.3, CH <sub>3</sub> | 0.86, s                                         | 24.2, CH <sub>3</sub> | 0.85, s                                         |
| 2'  | 79.8, CH              | 4.90, dd, (13.2, 3.6)                           | 79.3, CH              | 5.13, dd, (13.2, 3.0)                           |
| 3'  | 44.0, CH <sub>2</sub> | 2.48, dd, (17.4, 3.6)<br>2.85, dd, (17.4, 13.2) | 45.0, CH <sub>2</sub> | 2.61, dd, (16.8, 3.0)<br>2.87, dd, (16.8, 13.2) |
| 4'  | 197.0, C              |                                                 | 197.1, C              |                                                 |
| 5'  | 164.2, C              |                                                 | 164.3, C              |                                                 |
| 6'  | 115.7, C              |                                                 | 115.2, C              |                                                 |
| 7'  | 165.3, C              |                                                 | 165.4, C              |                                                 |
| 8'  | 96.2, CH              | 6.41, s                                         | 96.0, CH              | 6.36, s                                         |
| 9'  | 161.9, C              |                                                 | 161.9, C              |                                                 |
| 10' | 103.2, C              |                                                 | 103.4, C              |                                                 |
| 1'' | 131.9, C              |                                                 | 131.9, C              |                                                 |
| 2'' | 129.0, CH             | 7.36, d, (8.4)                                  | 130.1, CH             | 7.40, d, (8.4)                                  |
| 3'' | 115.4, CH             | 6.98, d, (8.4)                                  | 114.9, CH             | 6.96, d, (8.4)                                  |
| 4'' | 160.8, C              |                                                 | 160.0, C              |                                                 |
| 5'' | 115.4, CH             | 6.98, d, (8.4)                                  | 114.9, CH             | 6.96, d, (8.4)                                  |
| 6'' | 129.0, CH             | 7.36, d, (8.4)                                  | 130.1, CH             | 7.40, d, (8.4)                                  |



|                  |                       |                       |                       |                       |
|------------------|-----------------------|-----------------------|-----------------------|-----------------------|
| 1'''             | 103.6, CH             | 4.70, d, (7.8)        | 104.1, CH             | 4.73, d, (7.8)        |
| 2'''             | 77.3, CH              | 4.54, m               | 77.3, CH              | 4.56, dd, (9.6, 7.8)  |
| 3'''             | 85.5, CH              | 4.01, dd, (9.6, 3.0)  | 85.5, CH              | 4.01, dd, (9.6, 3.0)  |
| 4'''             | 72.2, CH              | 4.13, d, (2.4)        | 72.3, CH              | 4.14, d, (2.4)        |
| 5'''             | 70.8, CH              | 3.35, q, (6.6)        | 70.8, CH              | 3.40, q, (6.6)        |
| 6'''             | 17.3, CH <sub>3</sub> | 1.02, d, (6.6)        | 17.4, CH <sub>3</sub> | 1.06, d, (6.6)        |
| 1''''            | 103.9, CH             | 5.56, d, (7.8)        | 104.3, CH             | 5.78, d, (7.8)        |
| 2''''            | 76.5, CH              | 4.09, br t, (7.8)     | 76.6, CH              | 4.09, br t, (7.8)     |
| 3''''            | 79.2, CH              | 4.18, br t, (9.0)     | 79.2, CH              | 4.19, br t, (9.0)     |
| 4''''            | 72.4, CH              | 4.18, br t, (9.0)     | 72.5, CH              | 4.18, br t, (8.4)     |
| 5''''            | 77.9, CH              | 3.59, m               | 78.0, CH              | 3.60, m               |
| 6''''            | 63.4, CH              | 4.27, m               | 63.5, CH <sub>2</sub> | 4.28, m               |
|                  |                       | 4.30, m               |                       | 4.28, m               |
| 1'''''           | 104.3, CH             | 5.23, d, (7.8)        | 105.5, CH             | 5.24, d, (7.8)        |
| 2'''''           | 75.8, CH              | 3.96, br t, (7.8)     | 75.7, CH              | 3.96, br t, (7.8)     |
| 3'''''           | 78.8, CH              | 4.24, br t, (9.0)     | 78.8, CH              | 4.23, br t, (9.0)     |
| 4'''''           | 72.0, CH              | 4.22, br t, (9.0)     | 72.2, CH              | 4.21, br t, (9.0)     |
| 5'''''           | 78.9, CH              | 3.91, m               | 78.9, CH              | 3.92, m               |
| 6'''''           | 62.9, CH <sub>2</sub> | 4.32, dd, (12.0, 5.4) | 62.9, CH <sub>2</sub> | 4.31, (12.6, 5.4)     |
|                  |                       | 4.42, dd, (12.0, 2.4) |                       | 4.43, dd, (12.6, 3.0) |
| OCH <sub>3</sub> | 55.7, CH <sub>3</sub> | 3.65, s               | 55.7, CH <sub>3</sub> | 3.64, s               |

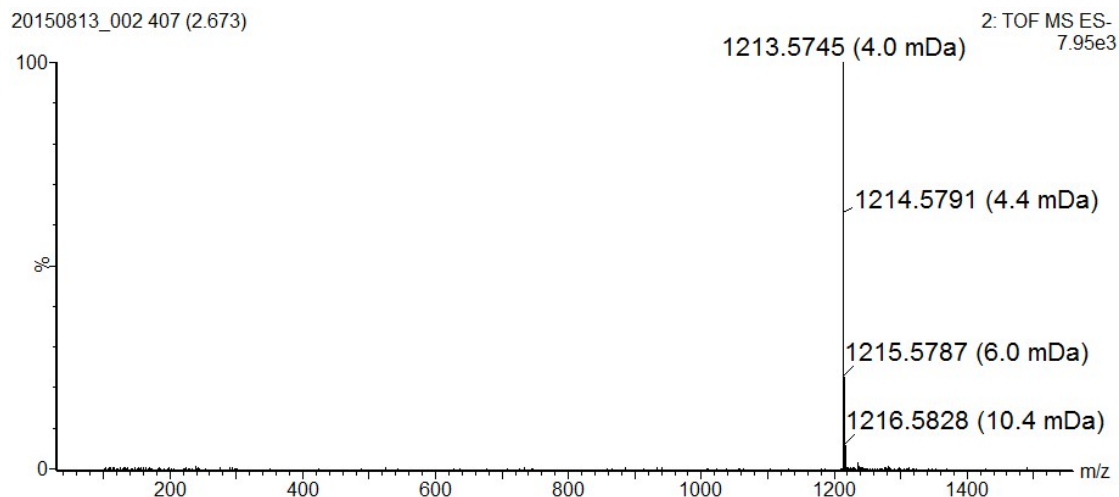

Figure S1. The HR-ESI-MS of 1.

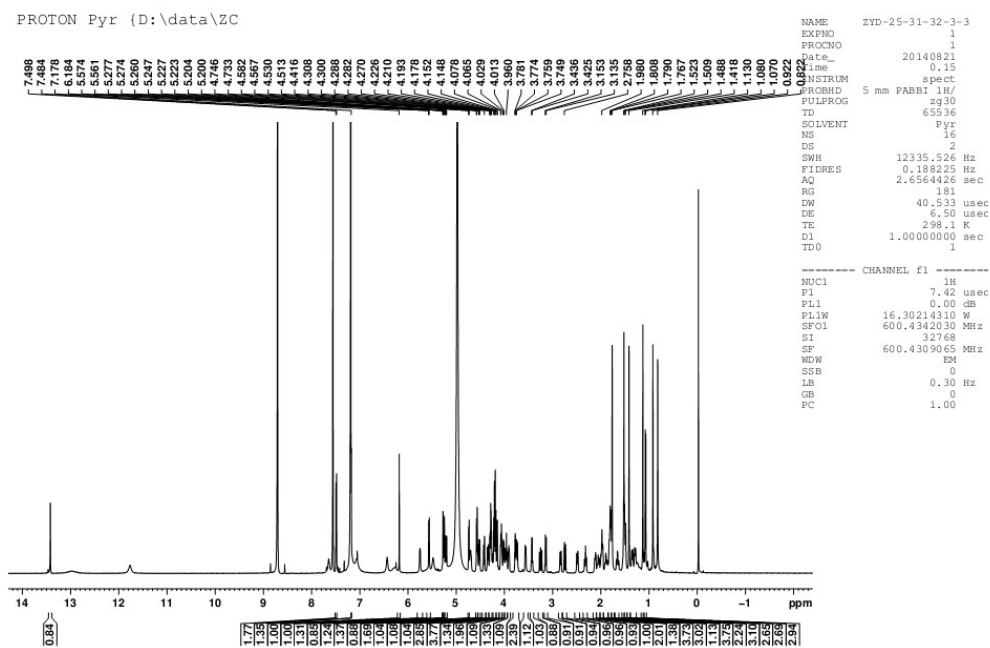

Figure S2. <sup>1</sup>H NMR spectrum of 1 in Pyridine-*d*<sub>5</sub>.

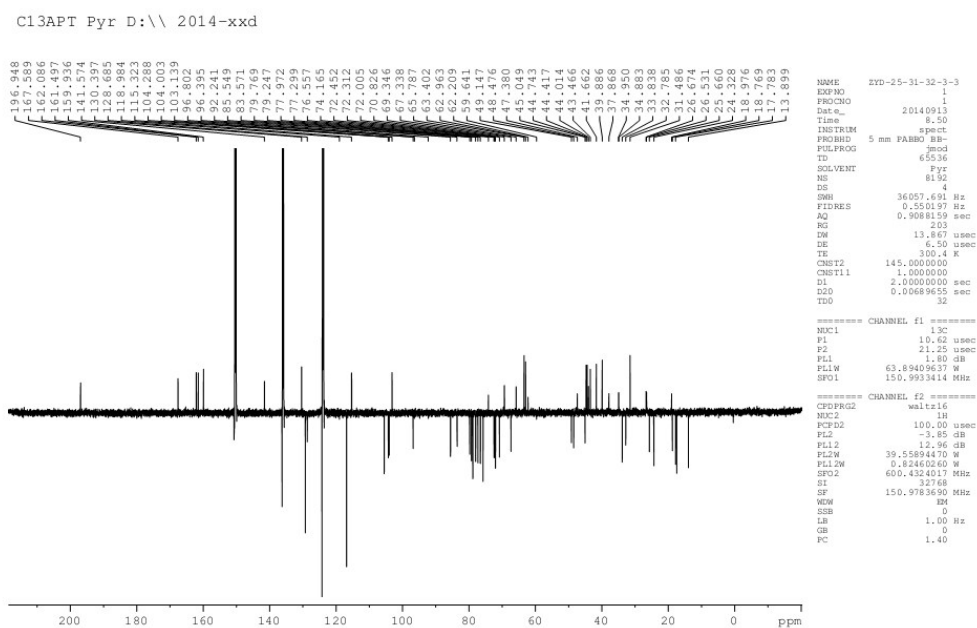

Figure S3.  $^{13}\text{C}$  APT spectrum of **1** in Pyridine- $d_5$ .

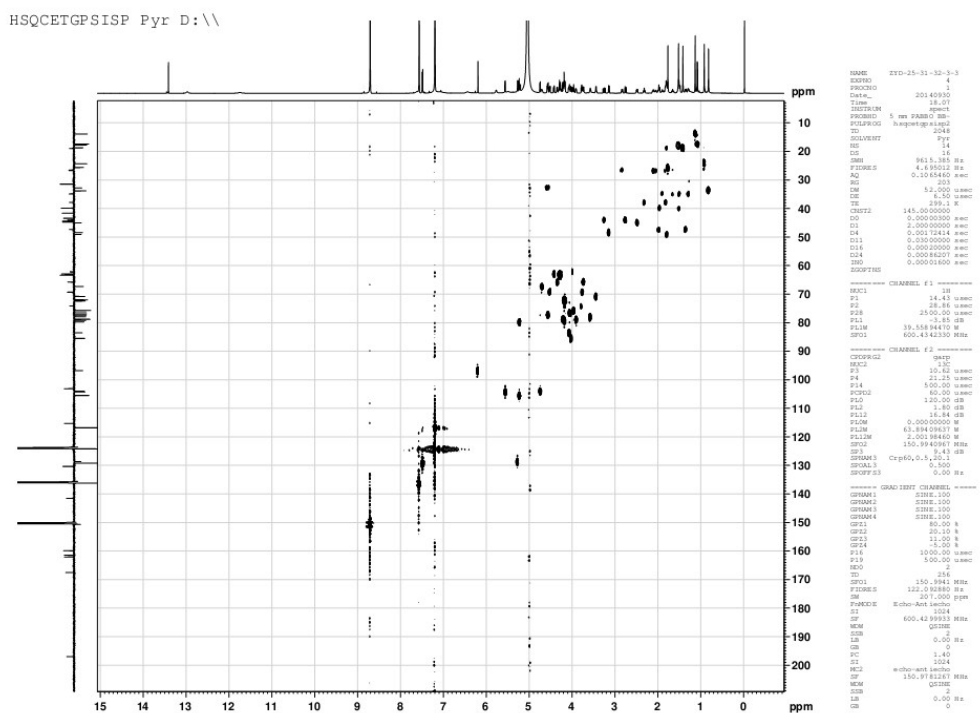

Figure S4. HSQC spectrum of **1** in Pyridine- $d_5$ .

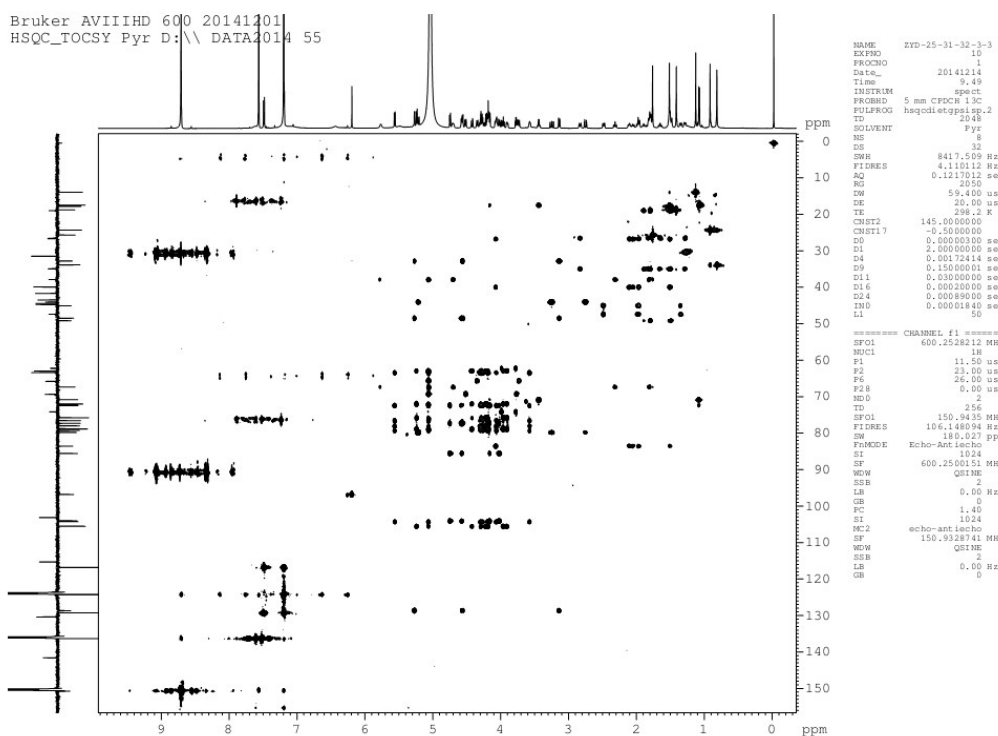

Figure S5. HSQC-TOCSY spectrum of **1** in Pyridine-*d*<sub>5</sub>.

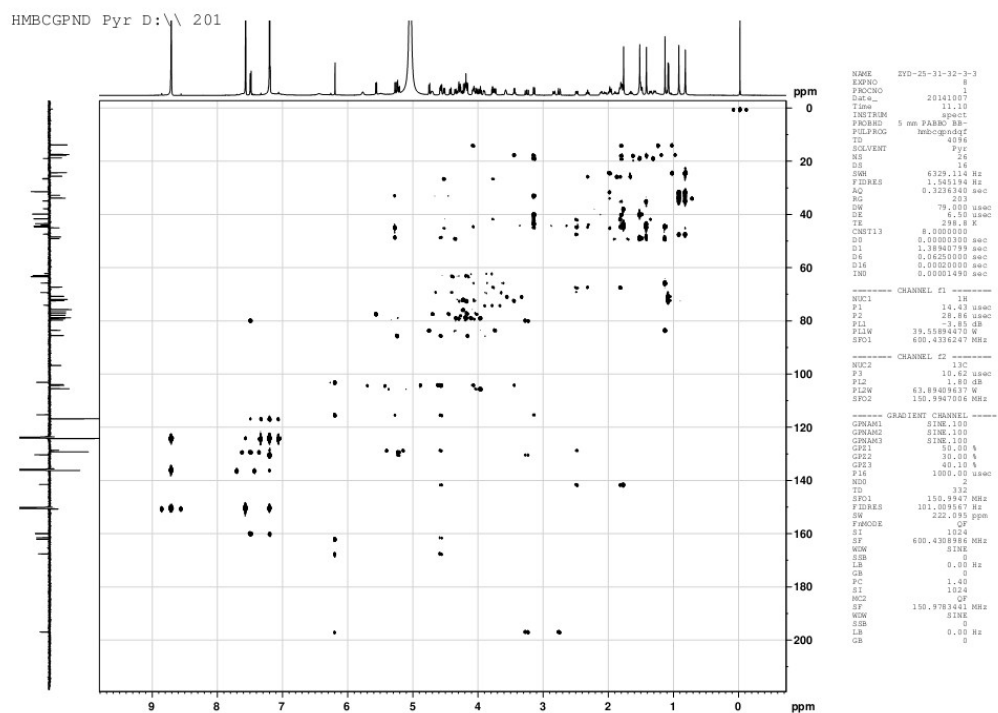

Figure S6. HMBC spectrum of **1** in Pyridine-*d*<sub>5</sub>.

COSYGMFSW Pyr D:\ 2

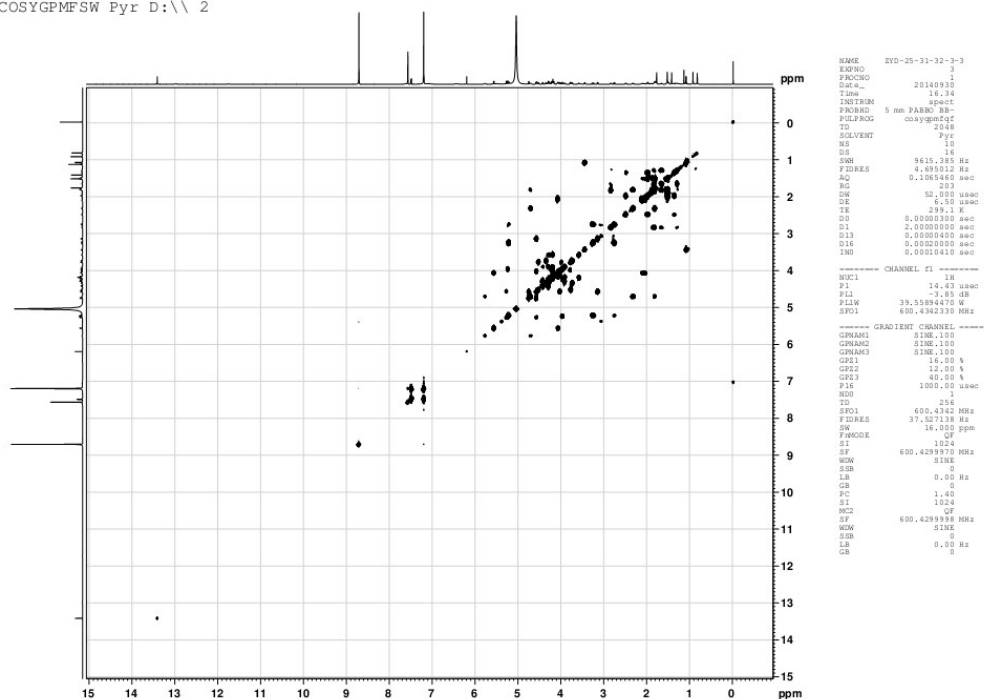

Figure S7. COSY spectrum of 1 in Pyridine- $d_5$ .

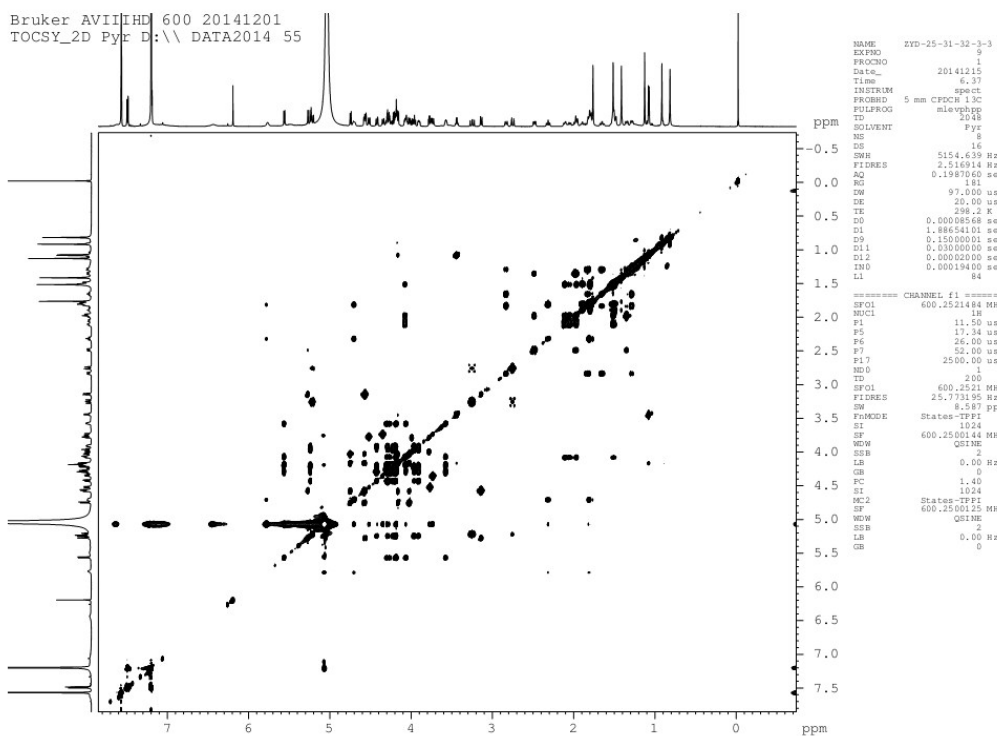

Figure S8. TOCSY spectrum of 1 in Pyridine- $d_5$ .

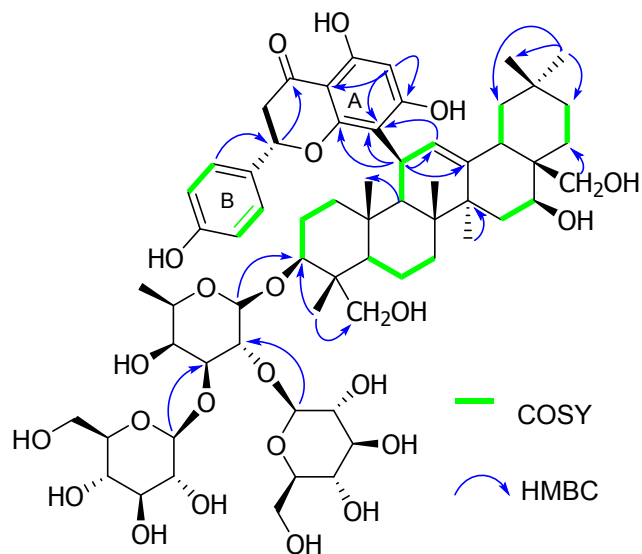

Figure S9. COSY and HMBC correlations of **1** in Pyridine-*d*<sub>5</sub>.

NOESYPSHW Pyr D:\ 20

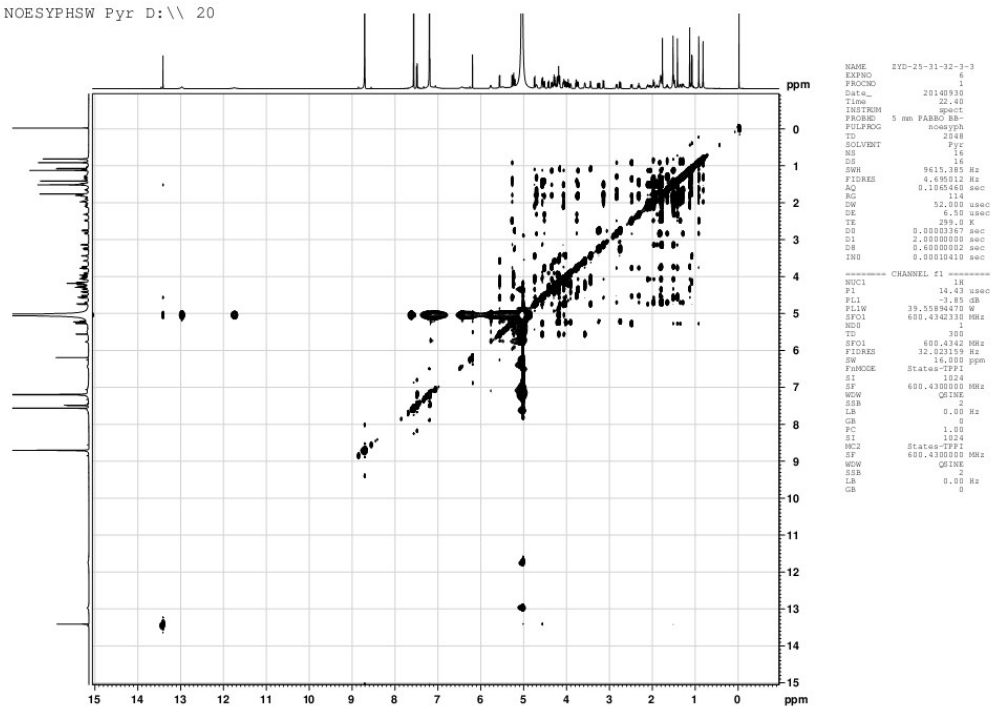

Figure S10. NOESY Spectrum of **1** in Pyridine-*d*<sub>5</sub>.

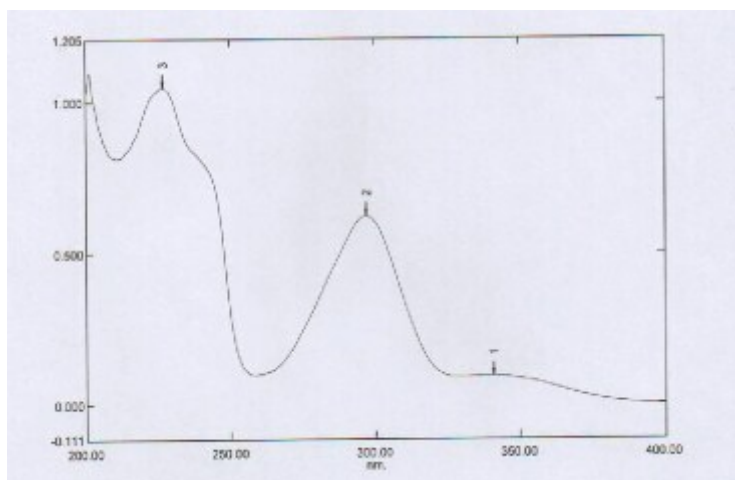

**Figure S11.** The experimental UV spectrum of **1**.

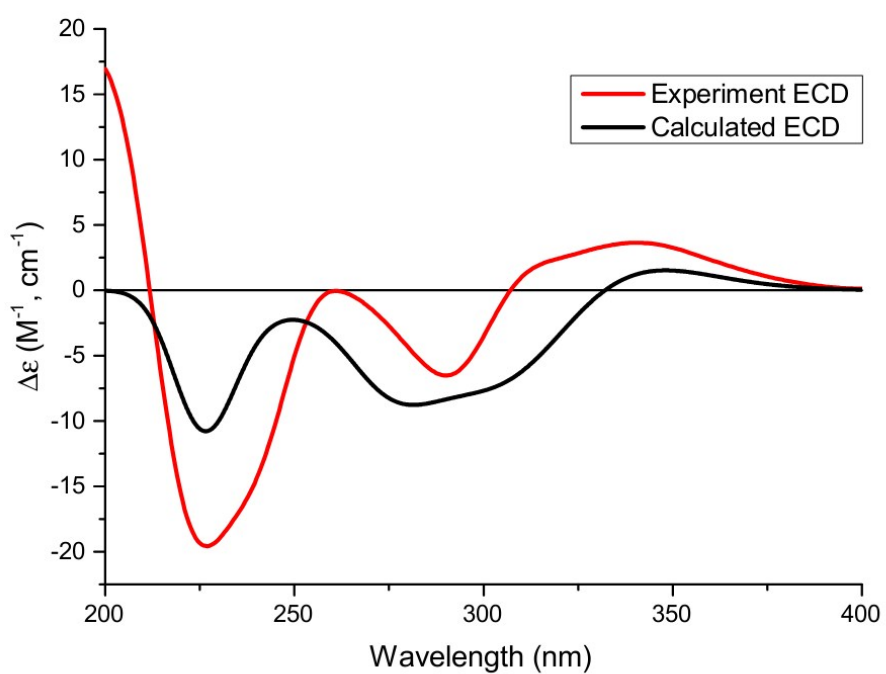

**Figure S12.** The experimental and calculated ECD spectra of **1**.

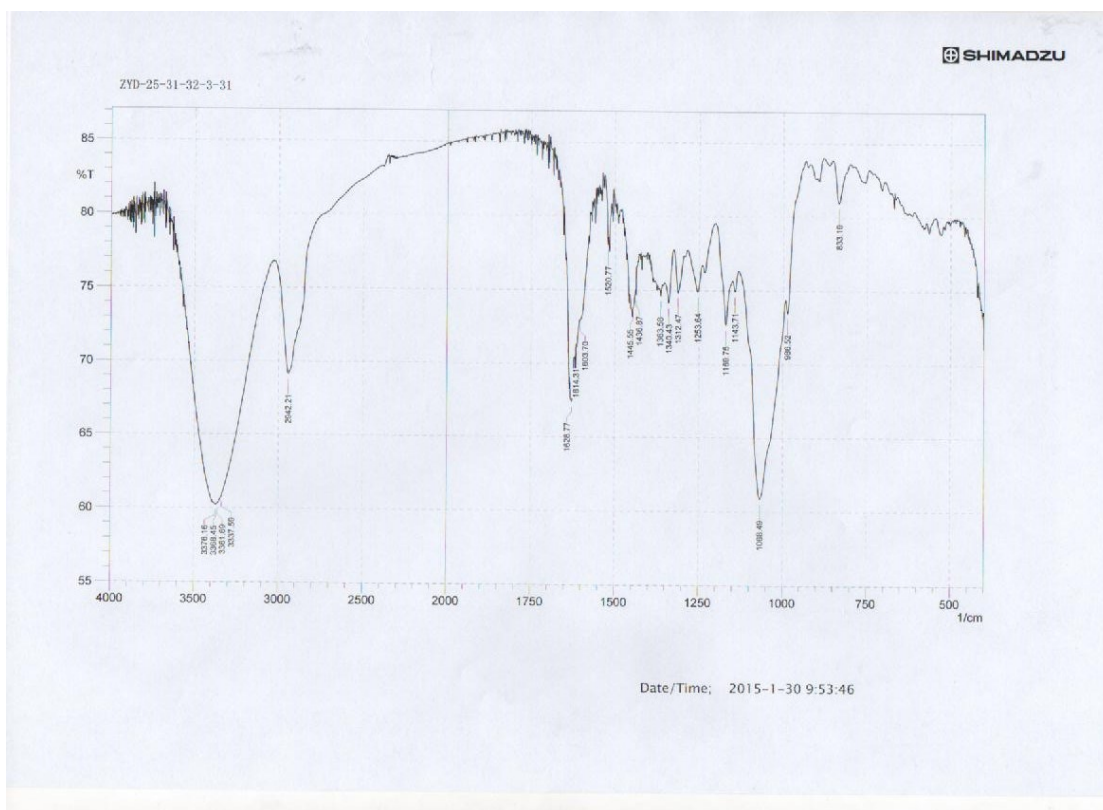

**Figure S13.** The IR spectrum of **1**.

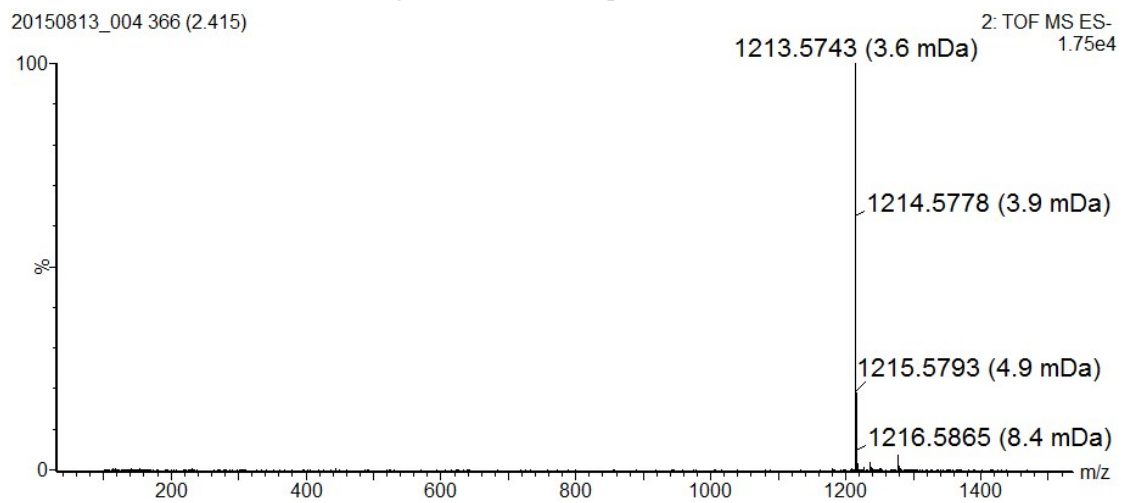

**Figure S14.** The HR-ESI-MS of **2**.



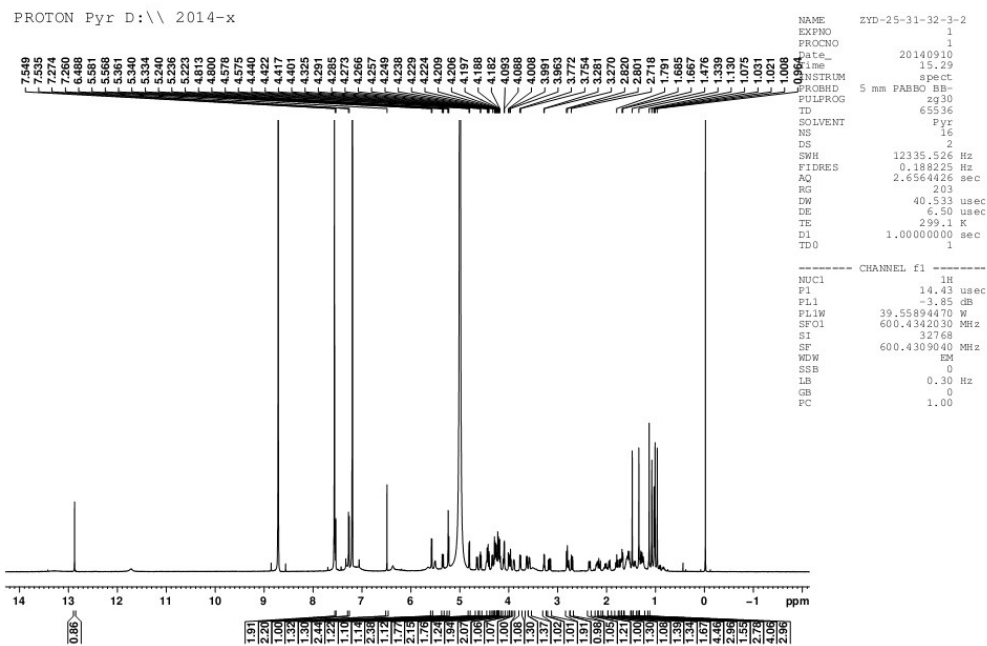

Figure S15. <sup>1</sup>H NMR spectrum of **2** in Pyridine-*d*<sub>5</sub>.

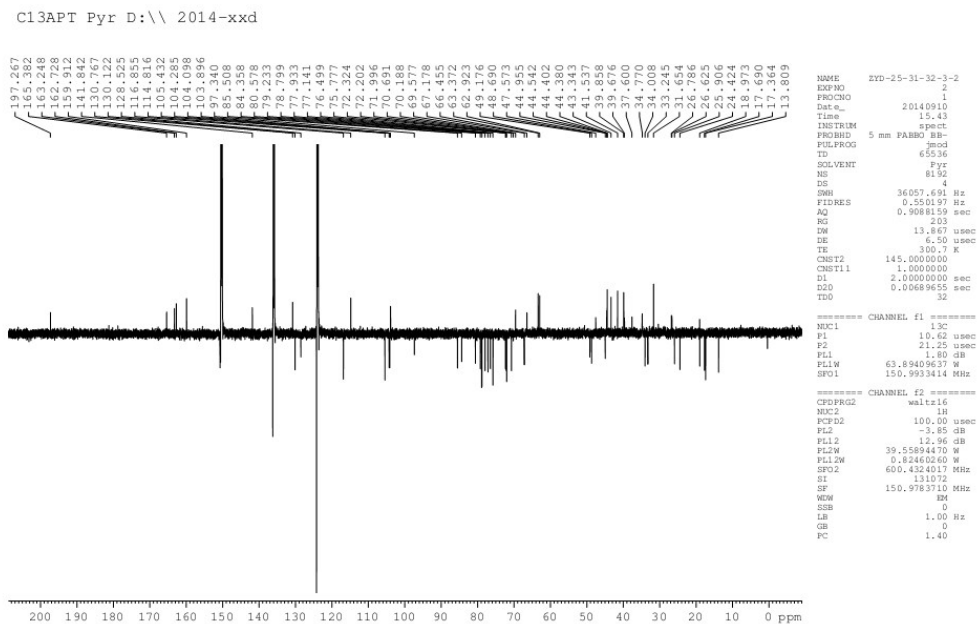

Figure S16. <sup>13</sup>C APT spectrum of **2** in Pyridine-*d*<sub>5</sub>.

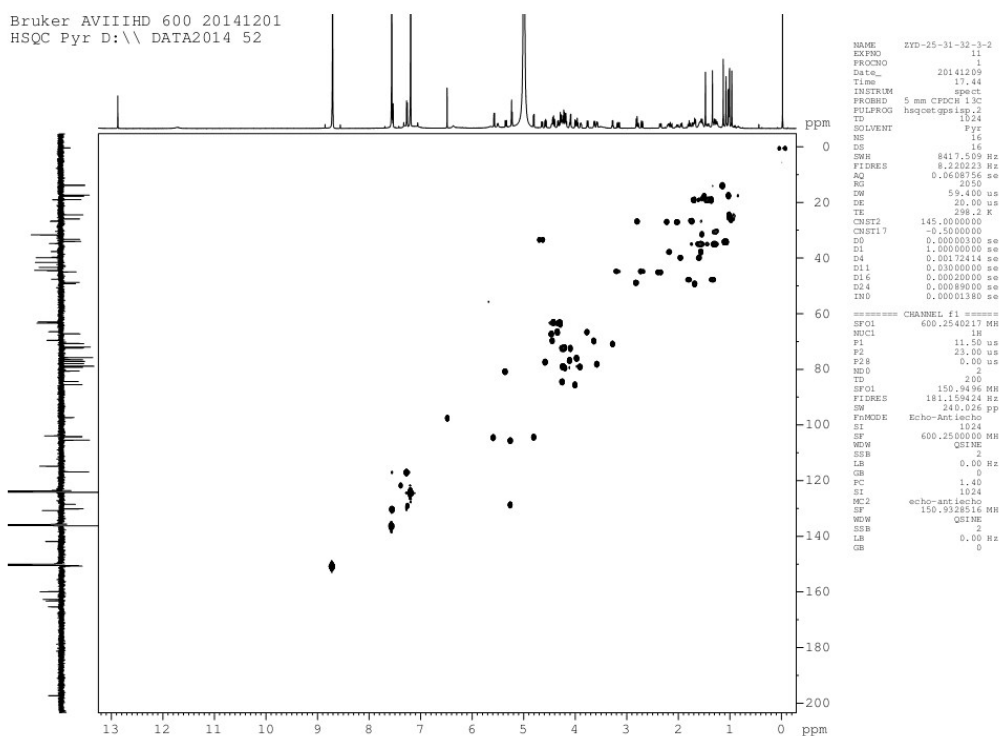

Figure S17. HSQC spectrum of **2** in Pyridine- $d_5$ .

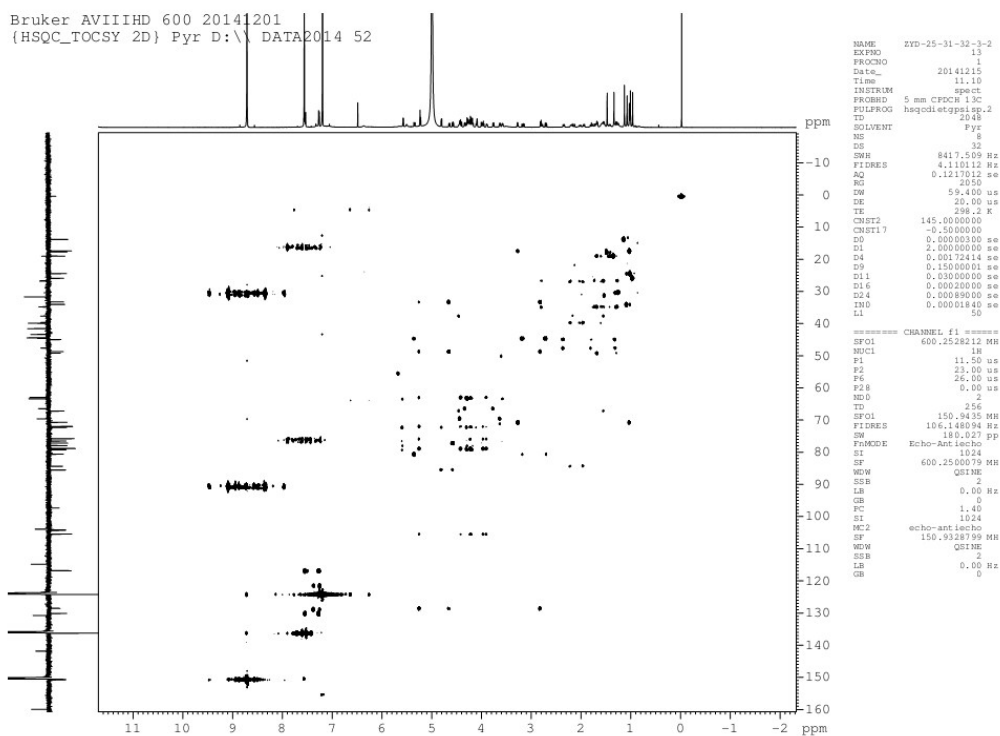

Figure S18. HSQC-TOCSY spectrum of **2** in Pyridine- $d_5$ .

Bruker AVIIHD 600 20141217  
 HMBC Pyr D:\ DATA2014 57

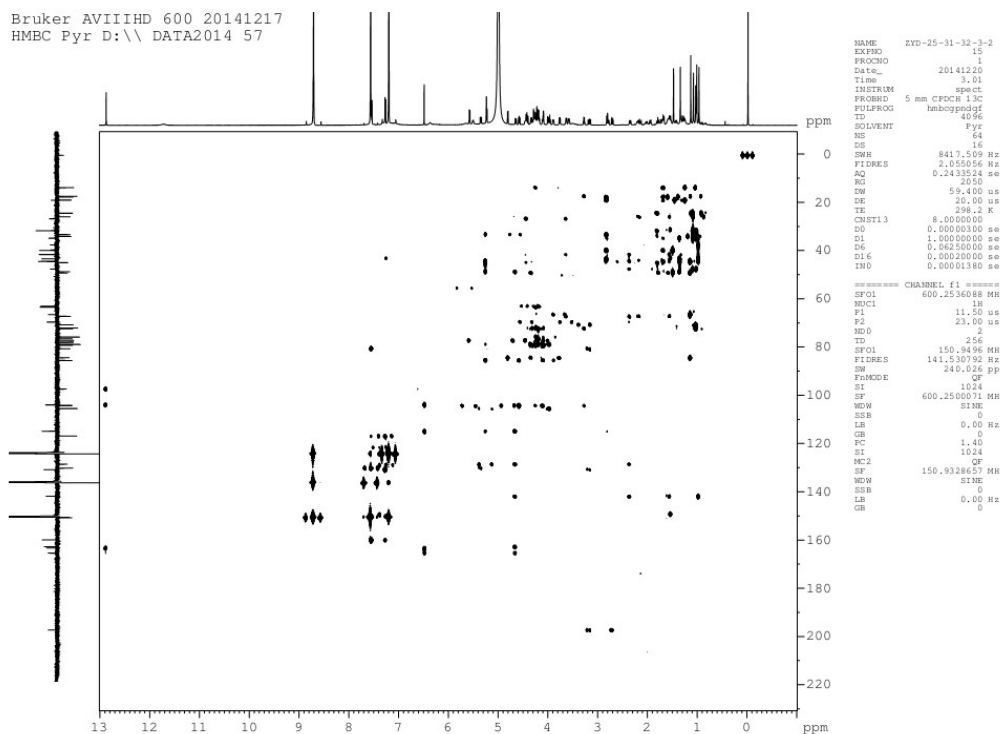

Figure S19. HMBC spectrum of 2 in Pyridine-*d*<sub>5</sub>.

COSYGMFSW Pyr D:\ 2

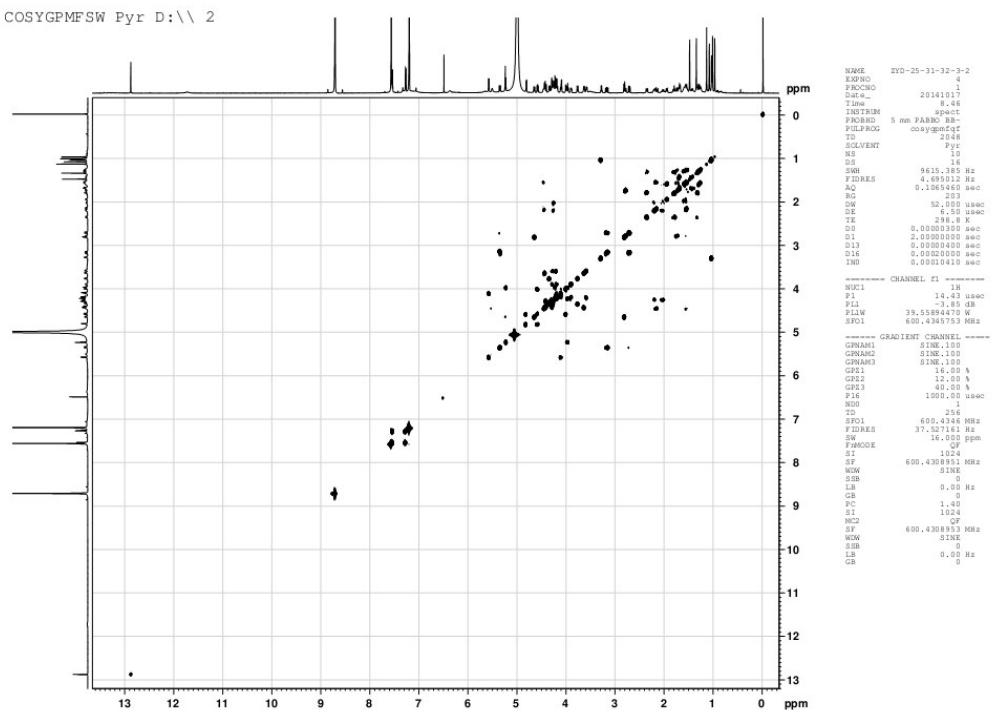

Figure S20. COSY spectrum of 2 in Pyridine-*d*<sub>5</sub>.

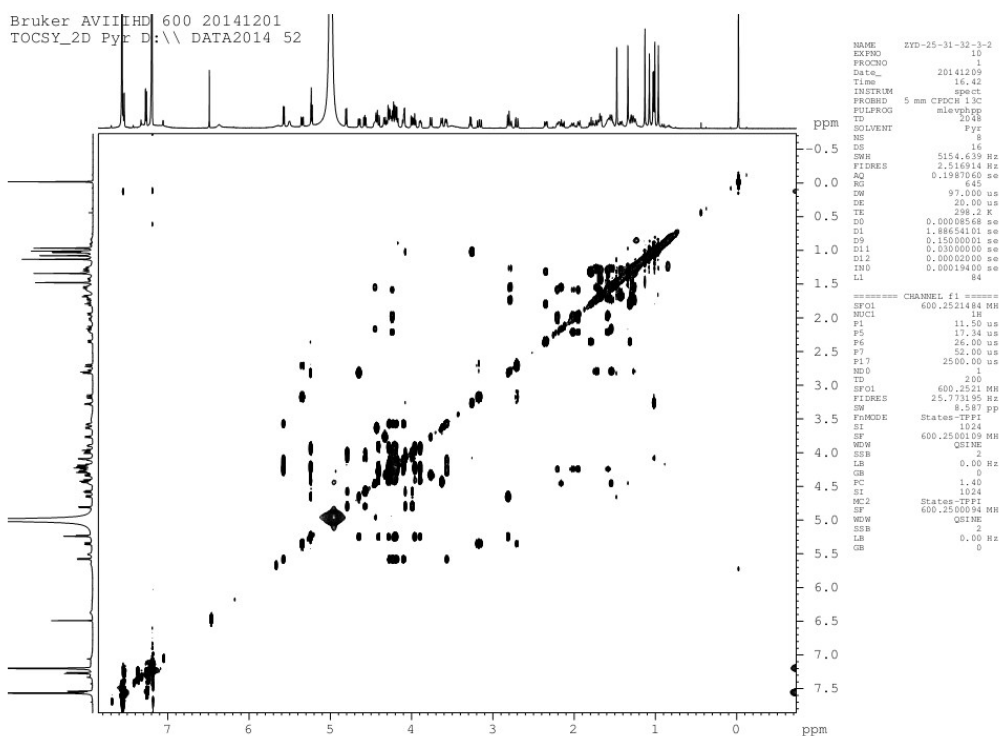

Figure S21. TOCSY spectrum of **2** in Pyridine- $d_5$ .

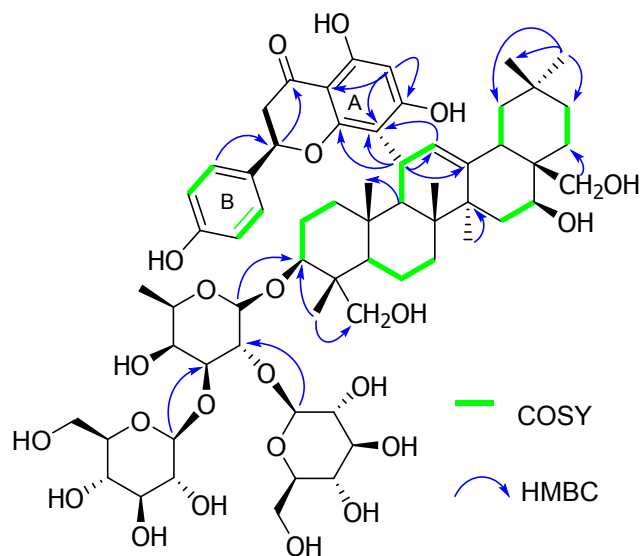

Figure S22. COSY and HMBC correlations of **2** in Pyridine- $d_5$ .



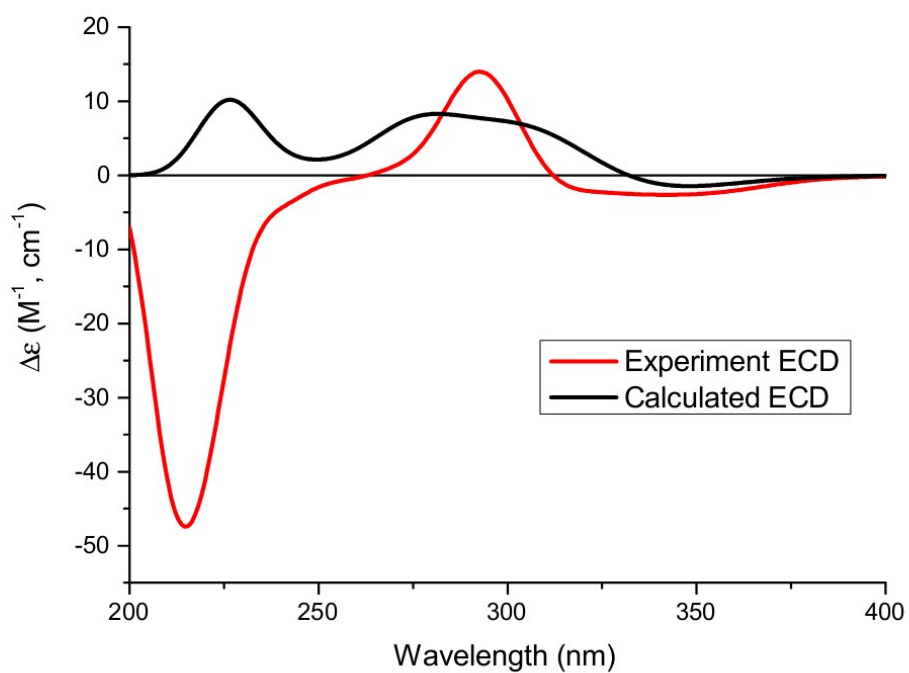

**Figure S25.** The experimental and calculated ECD spectra of **2**.

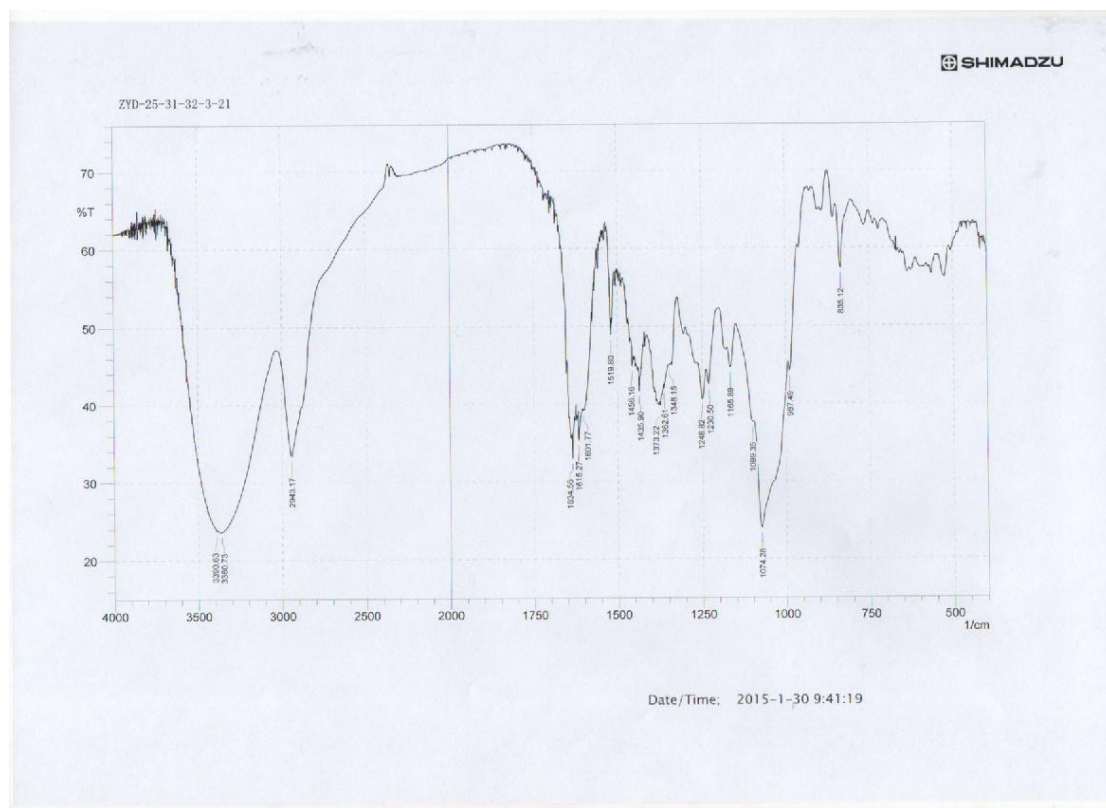

**Figure S26.** The IR spectrum of **2**.

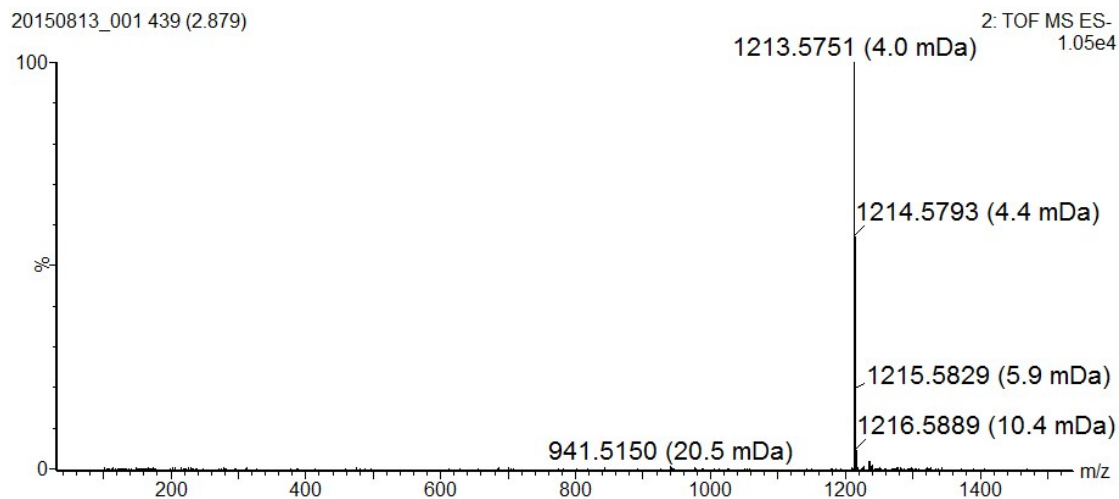

Figure S27. The HR-ESI-MS of **3**.

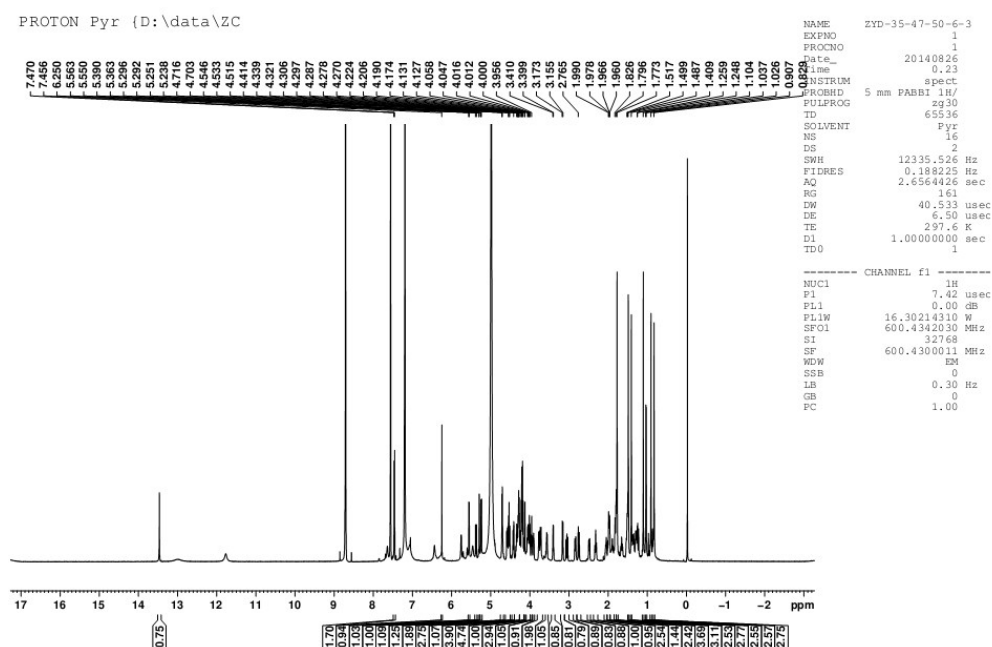

Figure S28. <sup>1</sup>H NMR spectrum of **3** in Pyridine-*d*<sub>5</sub>.

C13APT Pyr D:\\ 2014-xxd

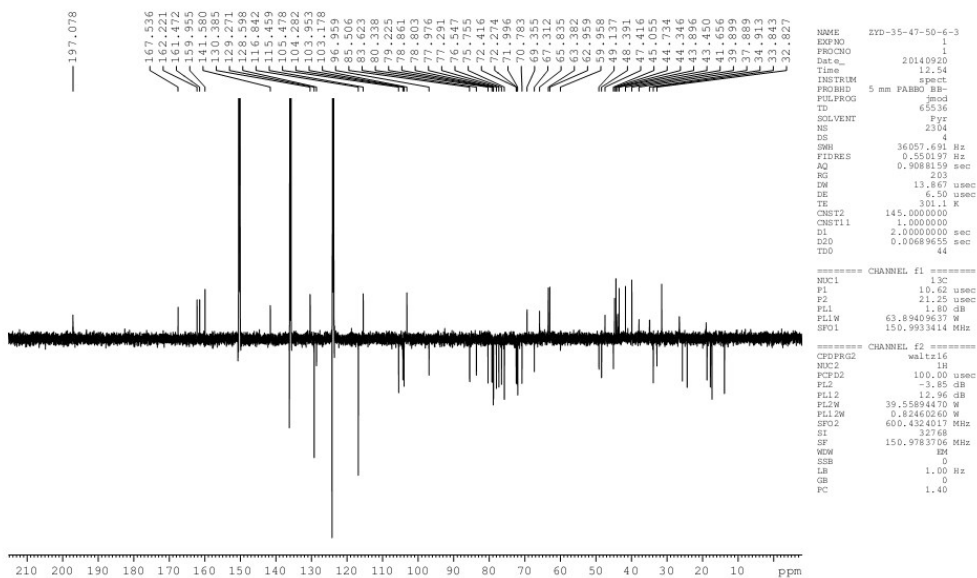

Figure S29. <sup>13</sup>C APT spectrum of 3 in Pyridine-*d*<sub>5</sub>.

HSQCETGPSISP Pyr D:\\

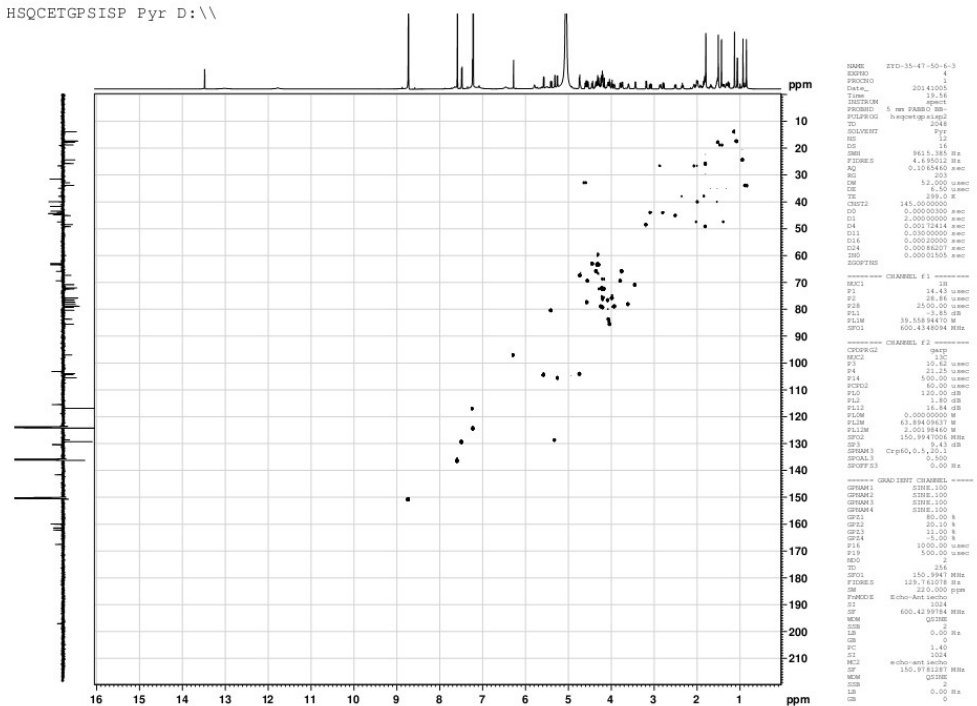

Figure S30. HSQC spectrum of 3 in Pyridine-*d*<sub>5</sub>.



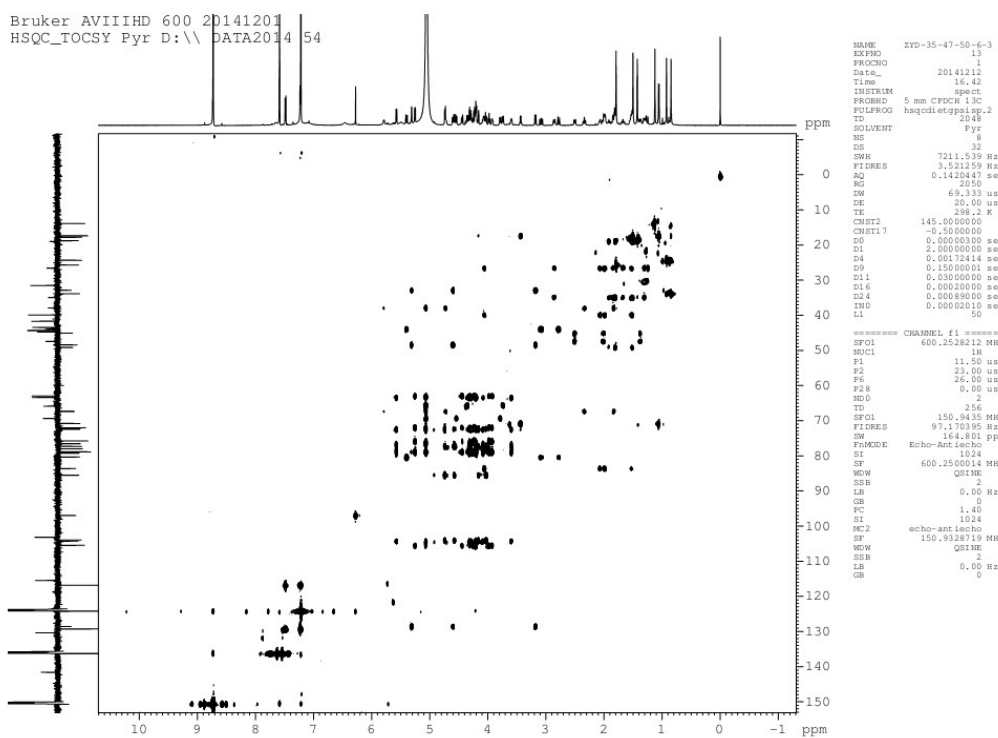

Figure S31. HSQC-TOCSY spectrum of **3** in Pyridine- $d_5$ .

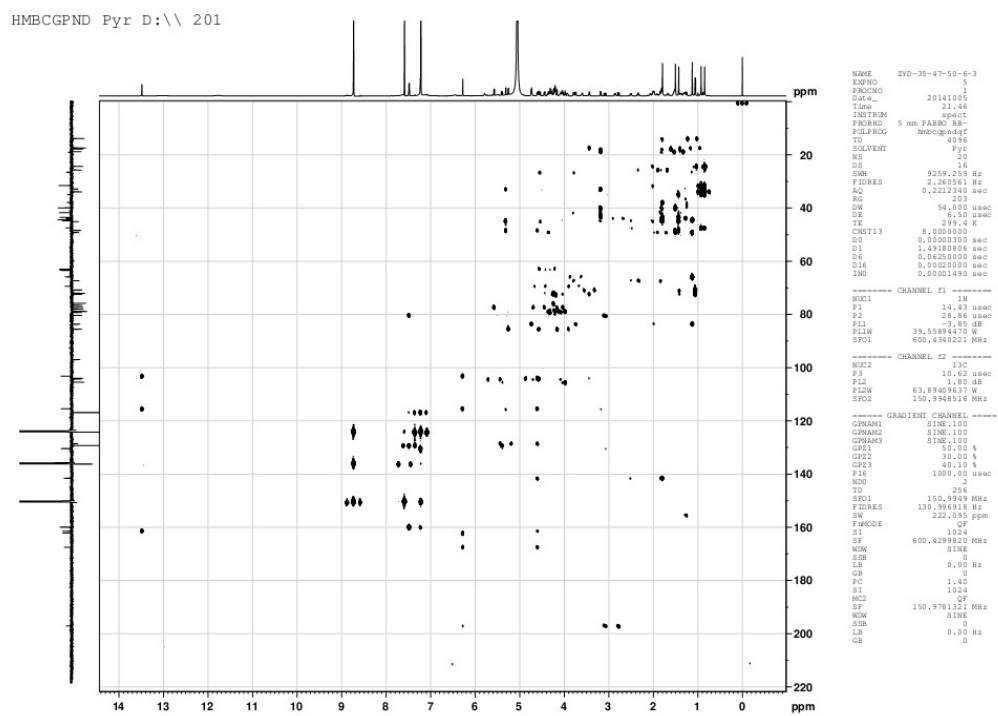

Figure S32. HMBC spectrum of **3** in Pyridine- $d_5$ .

COSYGMFSW Pyr D:\ 2

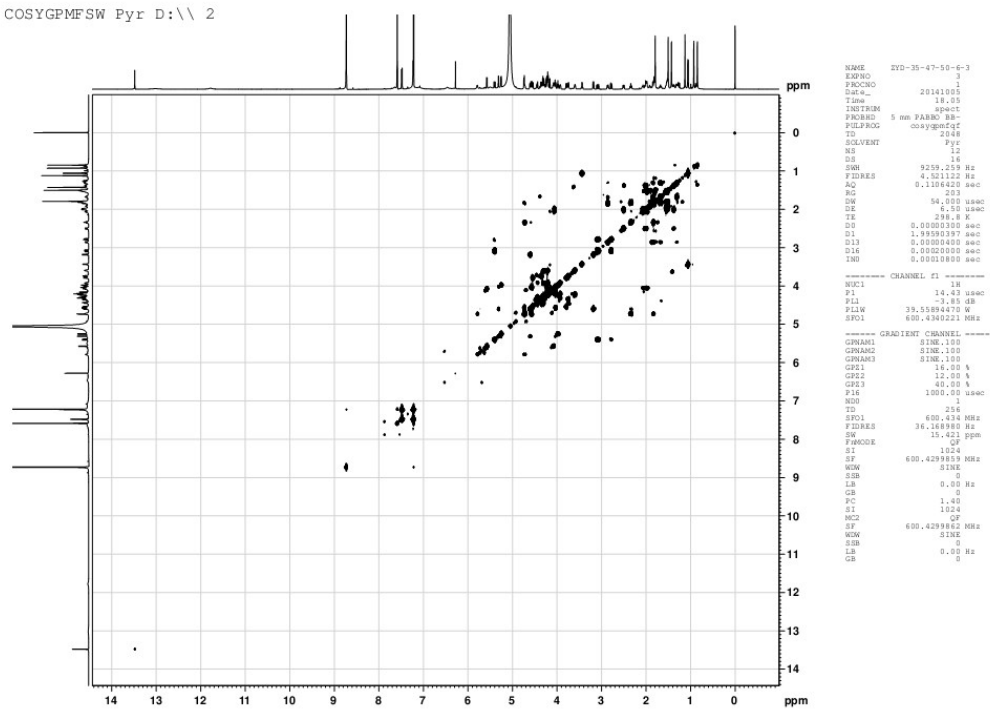

Figure S33. COSY spectrum of 3 in Pyridine-*d*<sub>5</sub>.

Bruker AVIIHHD 600 20141201  
 TOCSY\_2D Pyr D:\ DATA2014 54

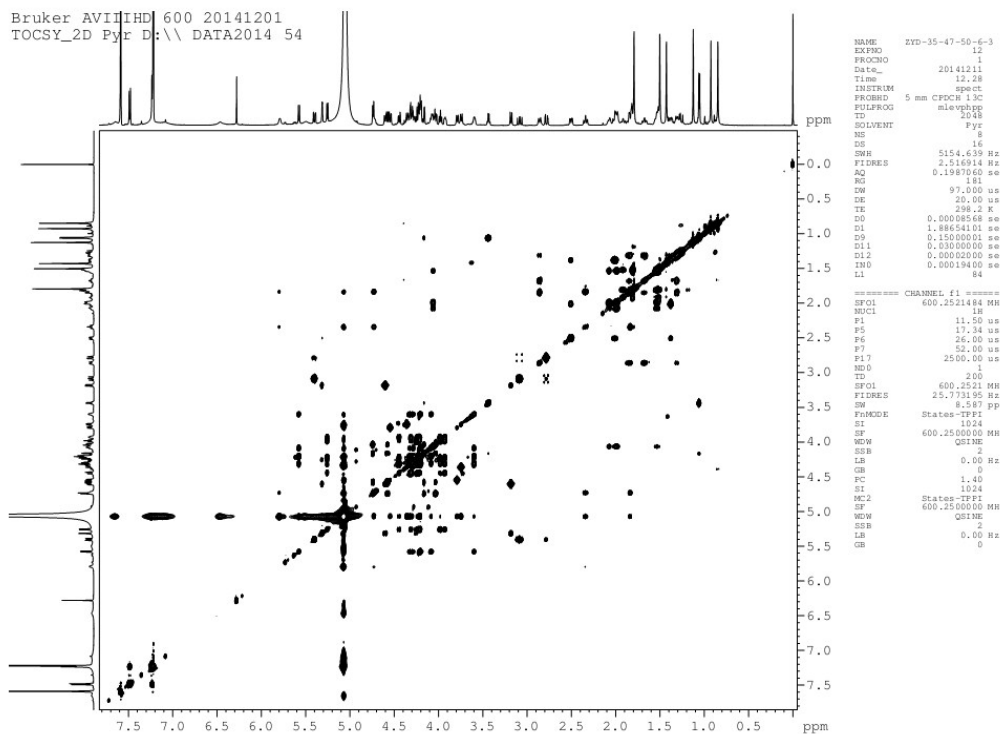

Figure S34. TOCSY spectrum of 3 in Pyridine-*d*<sub>5</sub>.

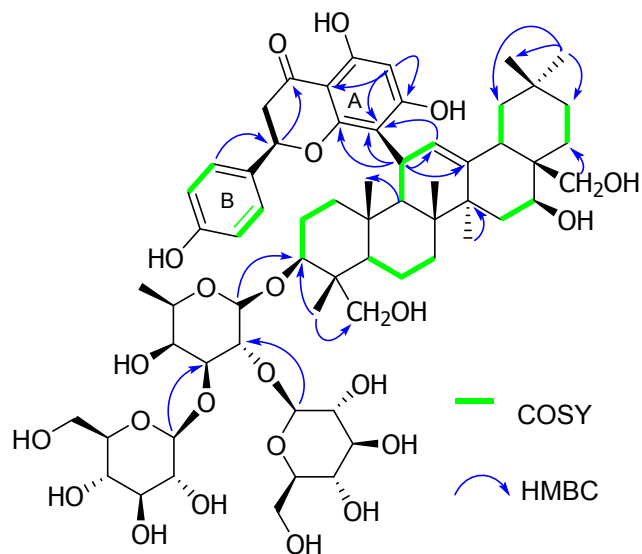

**Figure S35.** COSY and HMBC correlations of **3** in Pyridine-*d*<sub>5</sub>.

NOESYPSHW Pyr D:\ 20

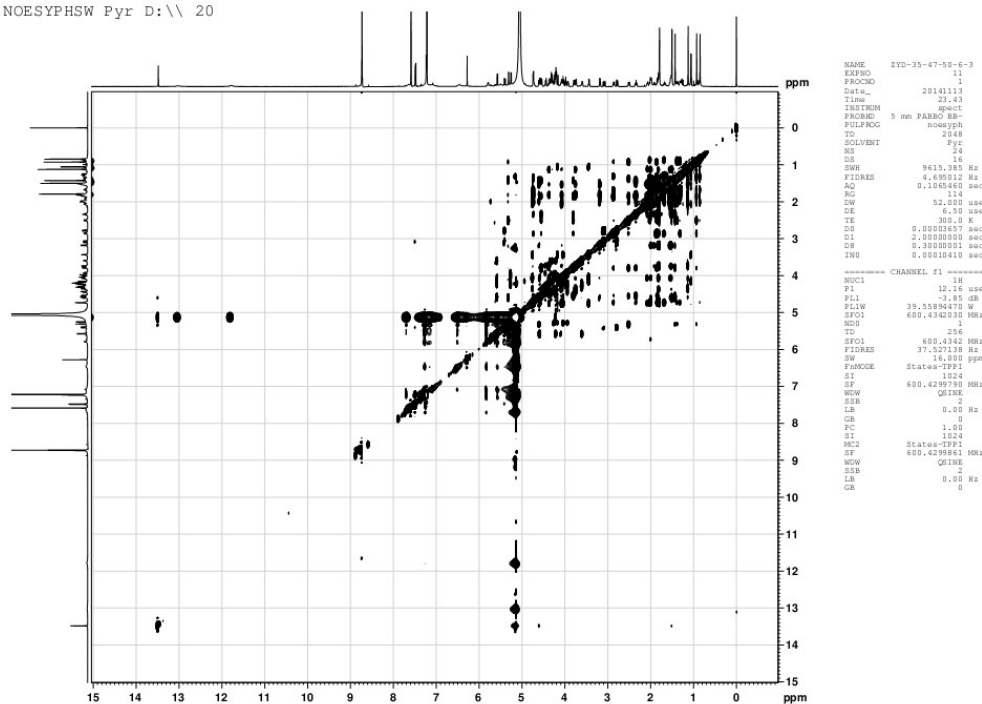

**Figure S36.** NOESY Spectrum of **3** in Pyridine-*d*<sub>5</sub>.

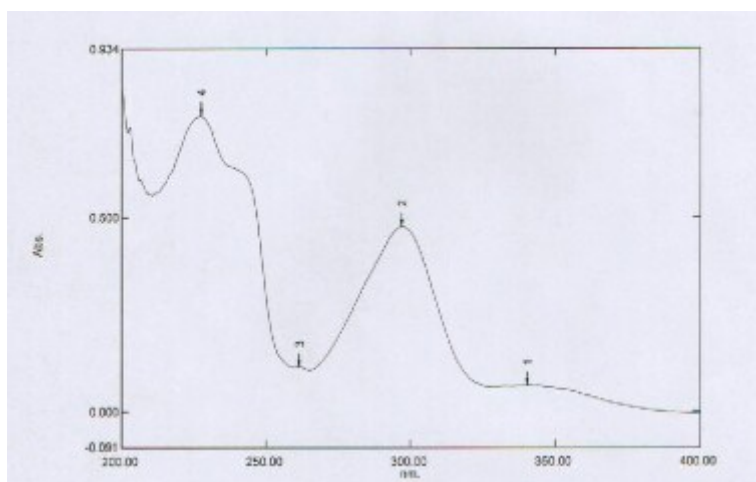

**Figure S37.** The experimental UV spectrum of **3**.

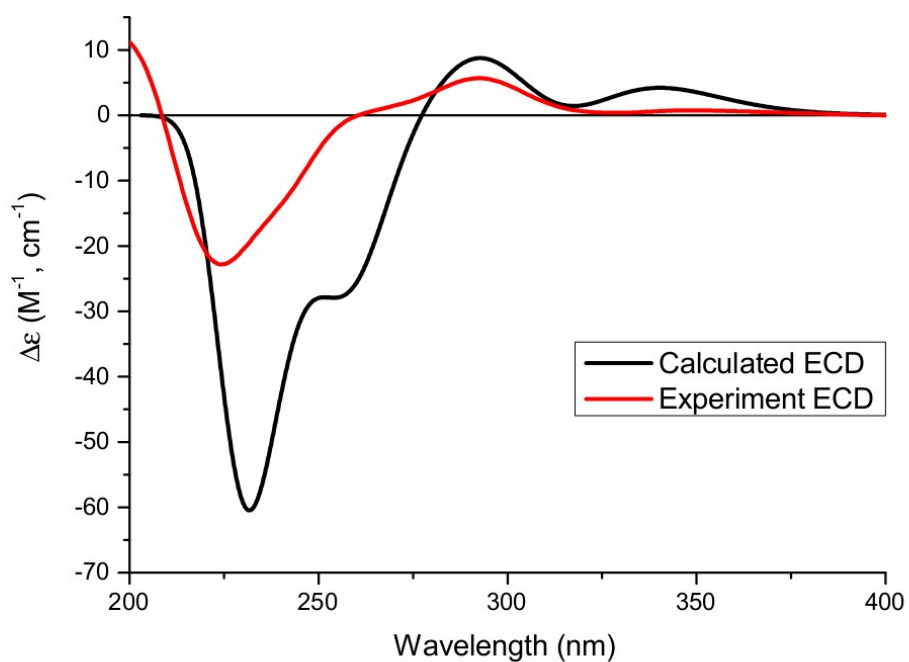

**Figure S38.** The experimental and calculated ECD spectra of **3**.

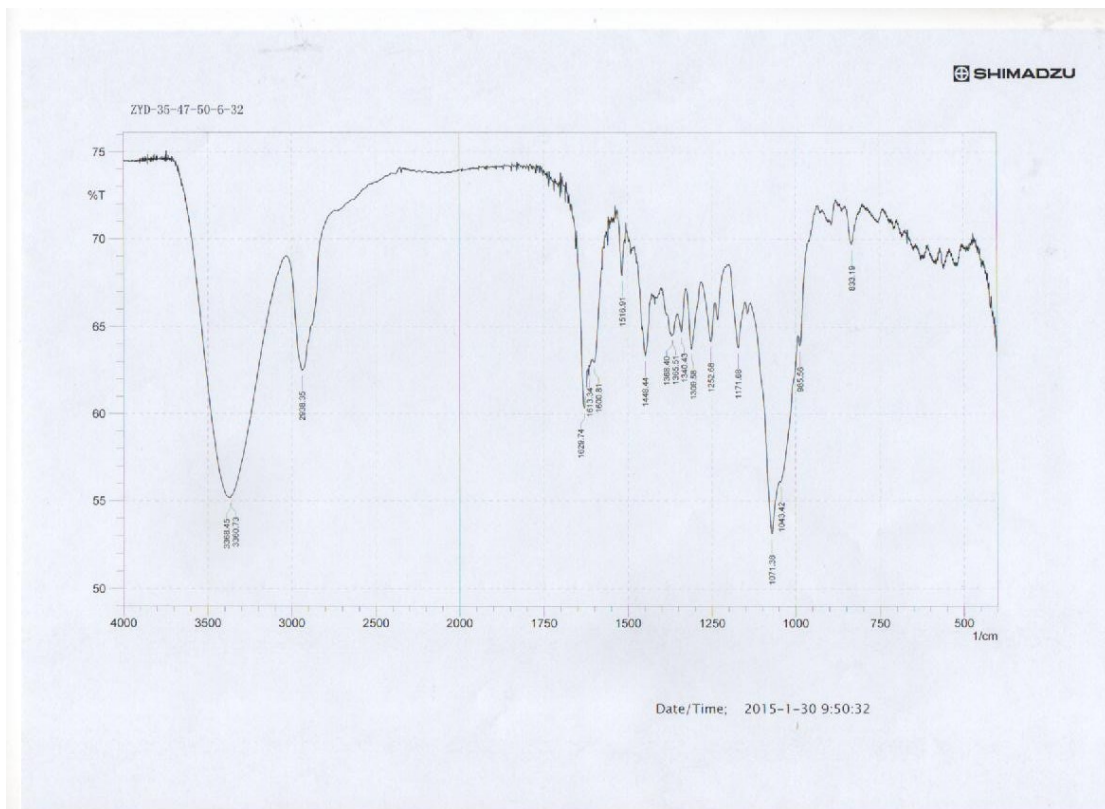

**Figure S39.** The IR spectrum of **3**.

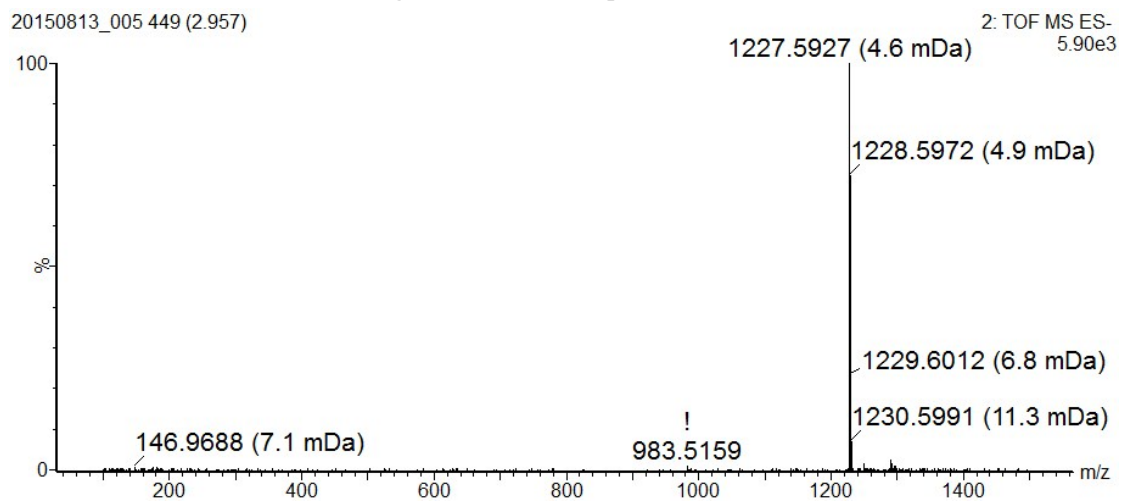

**Figure S40.** The HR-ESI-MS of **4**.





HMBCGPNP Pyr D:\ 201

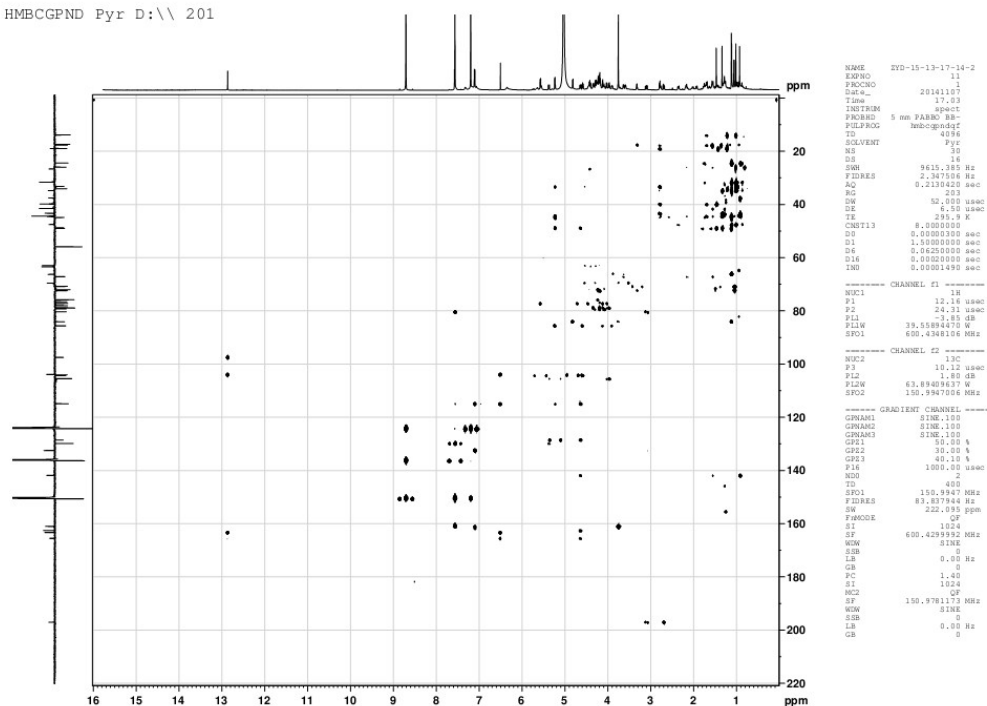

Figure S45. HMBC spectrum of 4 in Pyridine-*d*<sub>5</sub>.

COSYGPMFSW Pyr D:\ 2

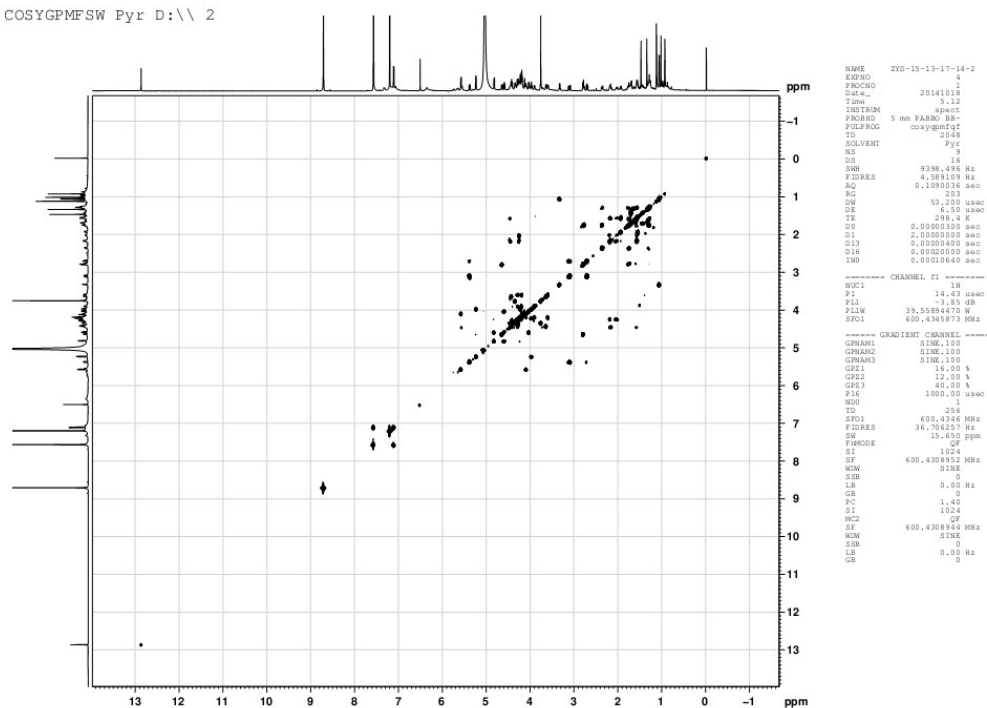

Figure S46. COSY spectrum of 4 in Pyridine-*d*<sub>5</sub>.



Bruker AVIIIHD 600 20141201  
 TOCSY\_2D Pyr D:\ DATA2014 56

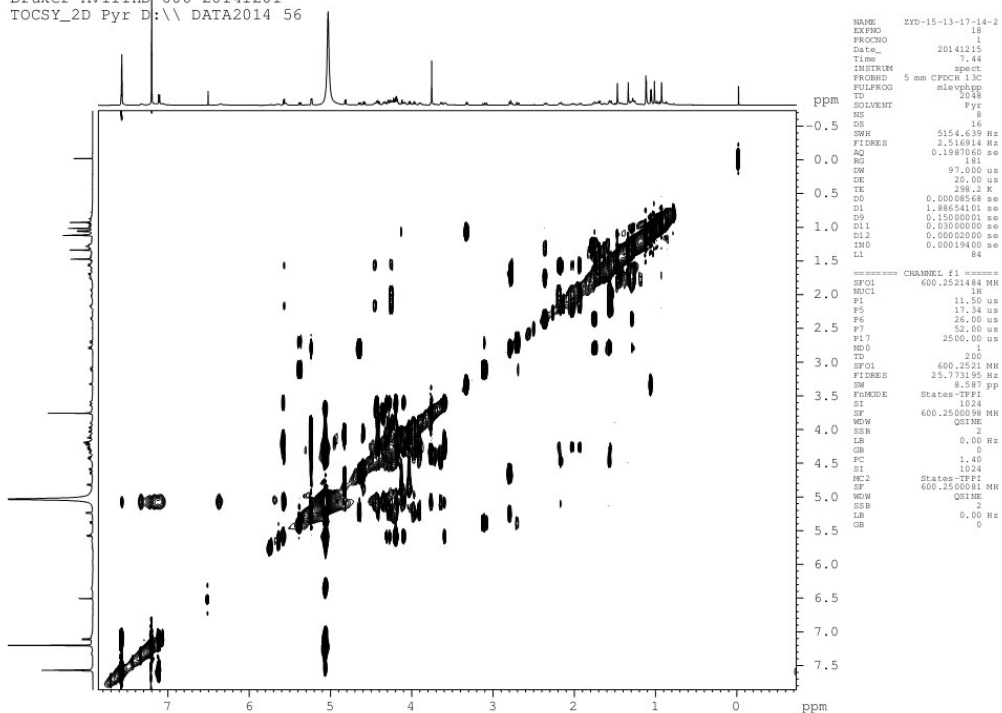

Figure S47. TOCSY spectrum of 4 in Pyridine-*d*<sub>5</sub>.

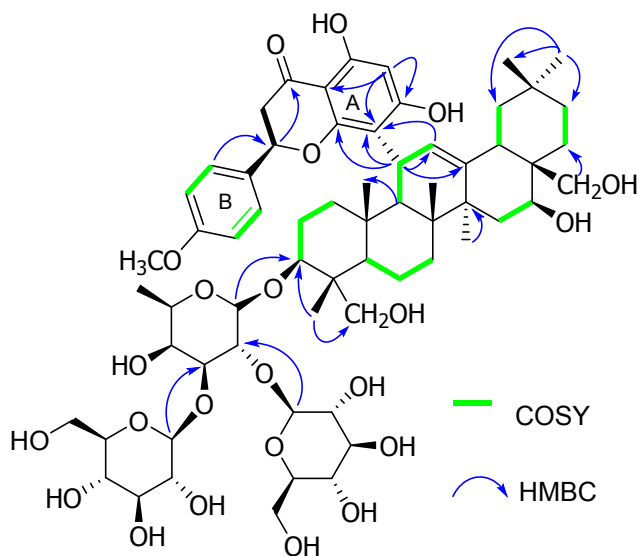

Figure S48. COSY and HMBC correlations of 4 in Pyridine-*d*<sub>5</sub>.

NOESYPSHW Pyr D:\\ 20

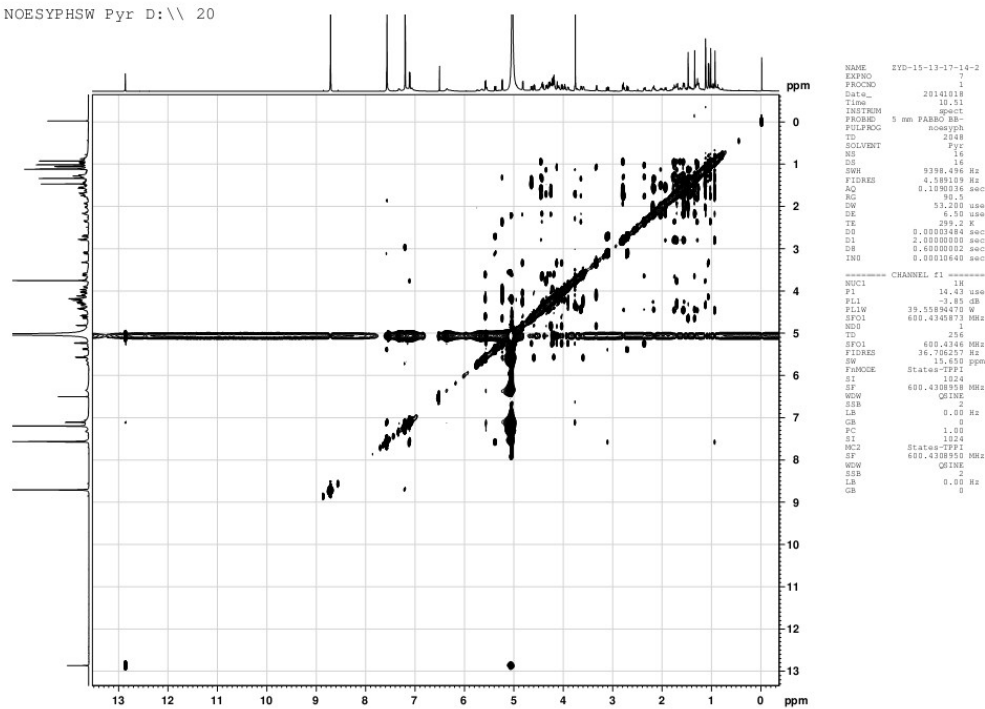

Figure S49. NOESY Spectrum of 4 in Pyridine- $d_5$ .

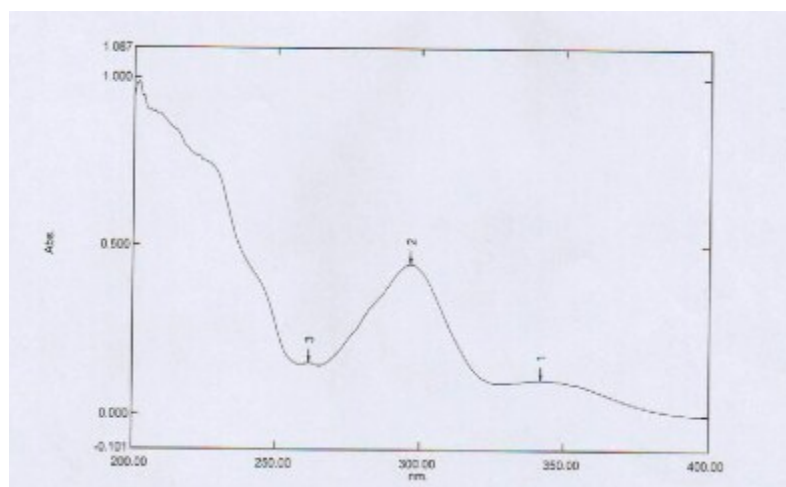

Figure S50. The experimental UV spectrum of 4.

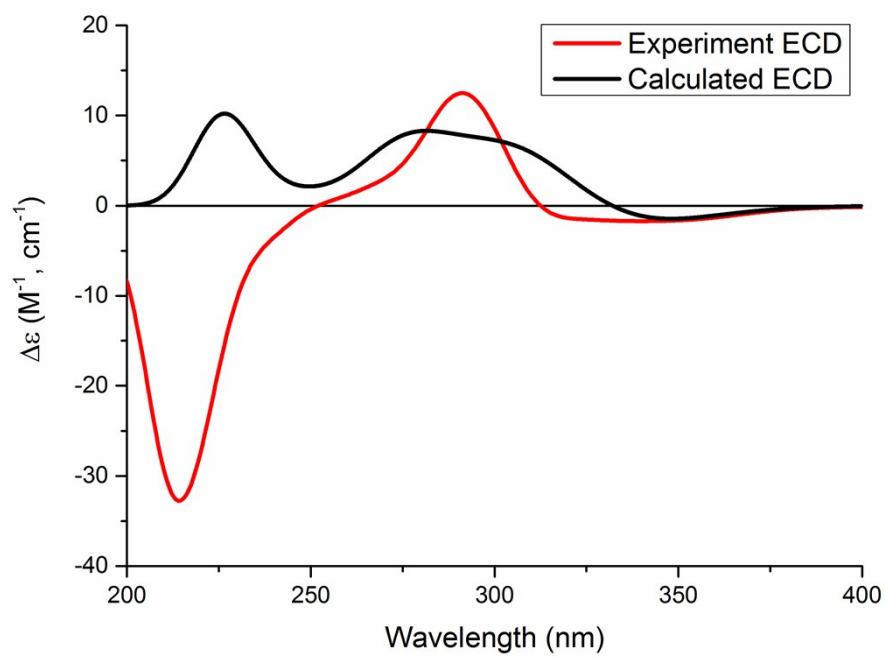

Figure S51. The experimental ECD spectrum of 4.

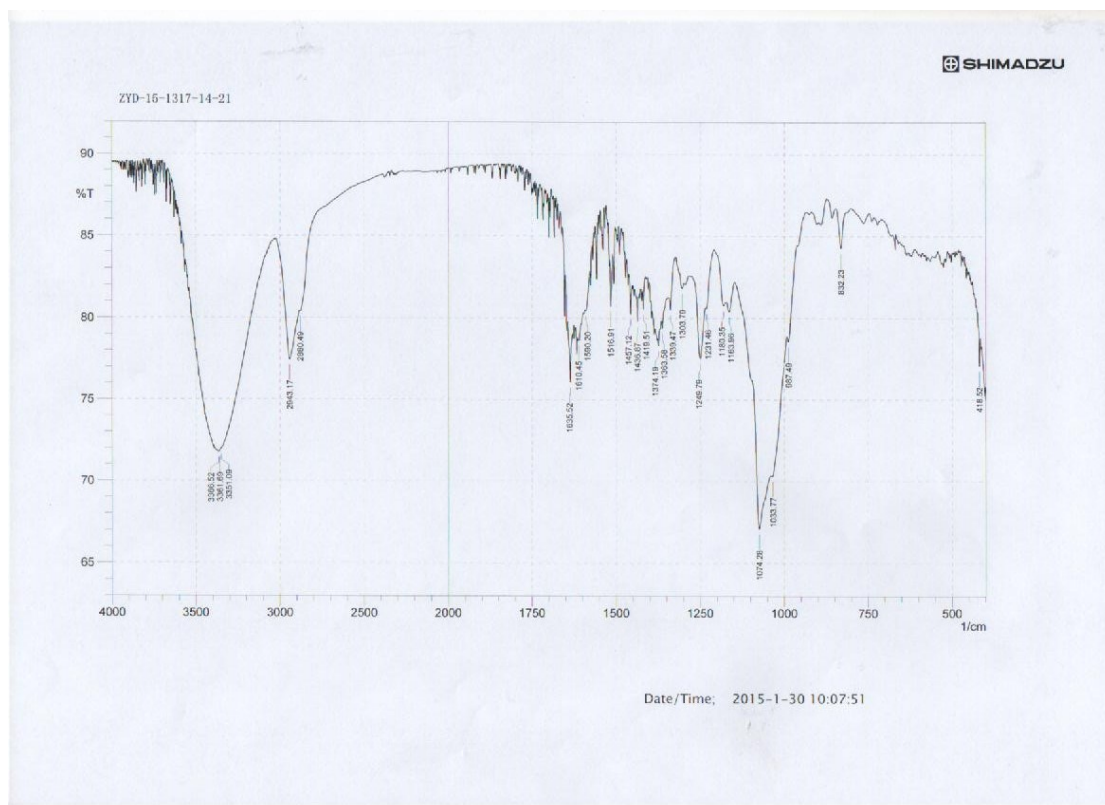

Figure S52. The IR spectrum of 4.

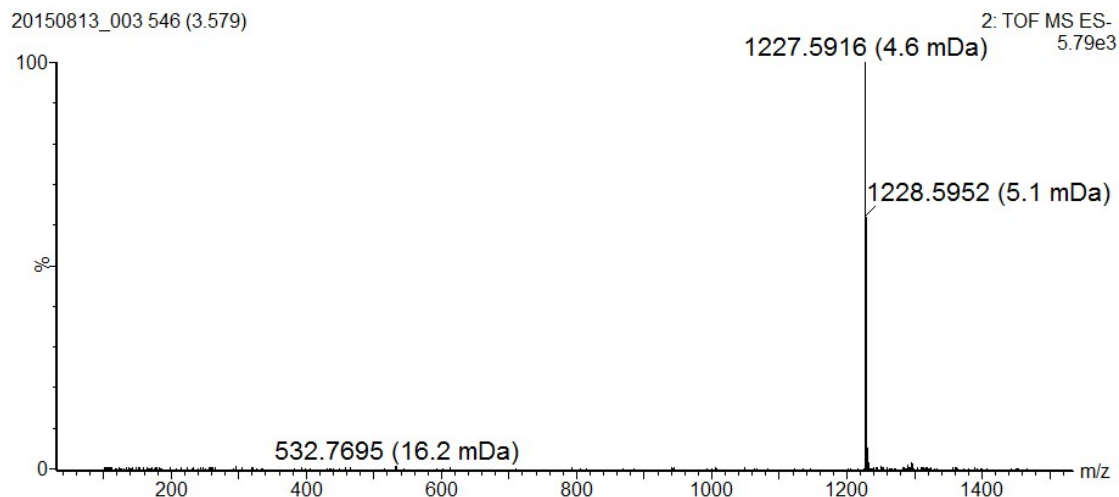

Figure S53. The HR-ESI-MS of **5**.

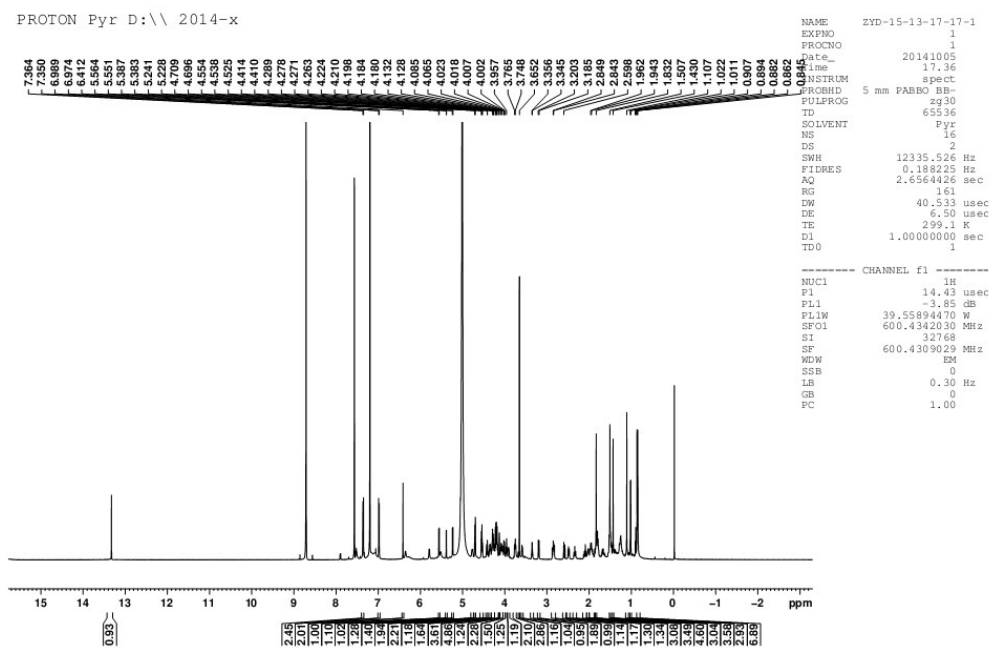

Figure S54. <sup>1</sup>H NMR spectrum of **5** in Pyridine-*d*<sub>5</sub>.

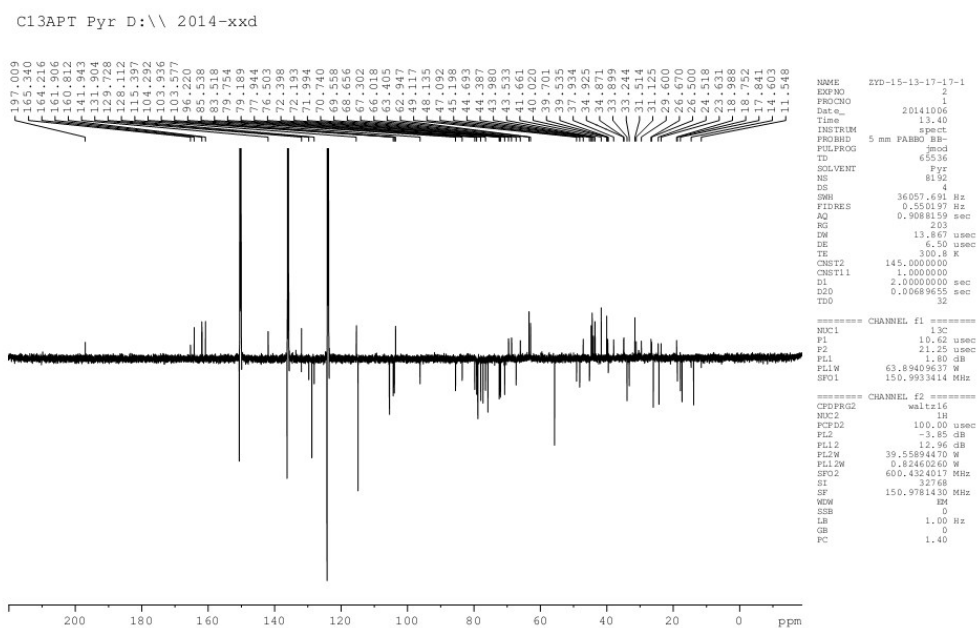

Figure S55.  $^{13}\text{C}$  APT spectrum of **5** in Pyridine- $d_5$ .

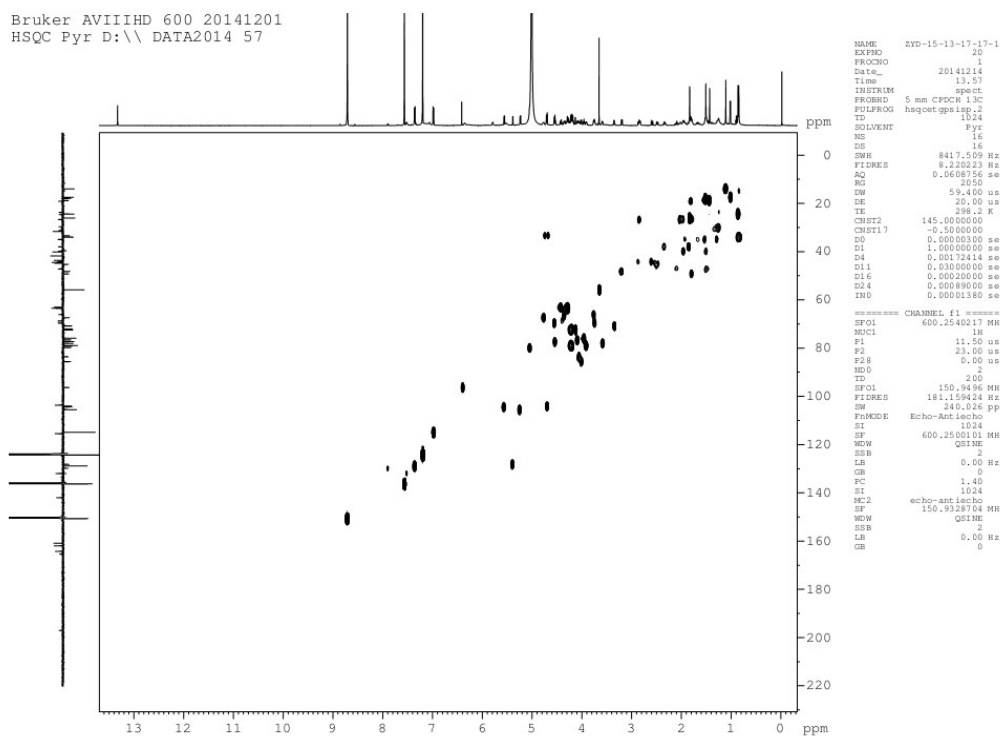

Figure S56. HSQC spectrum of **5** in Pyridine- $d_5$ .

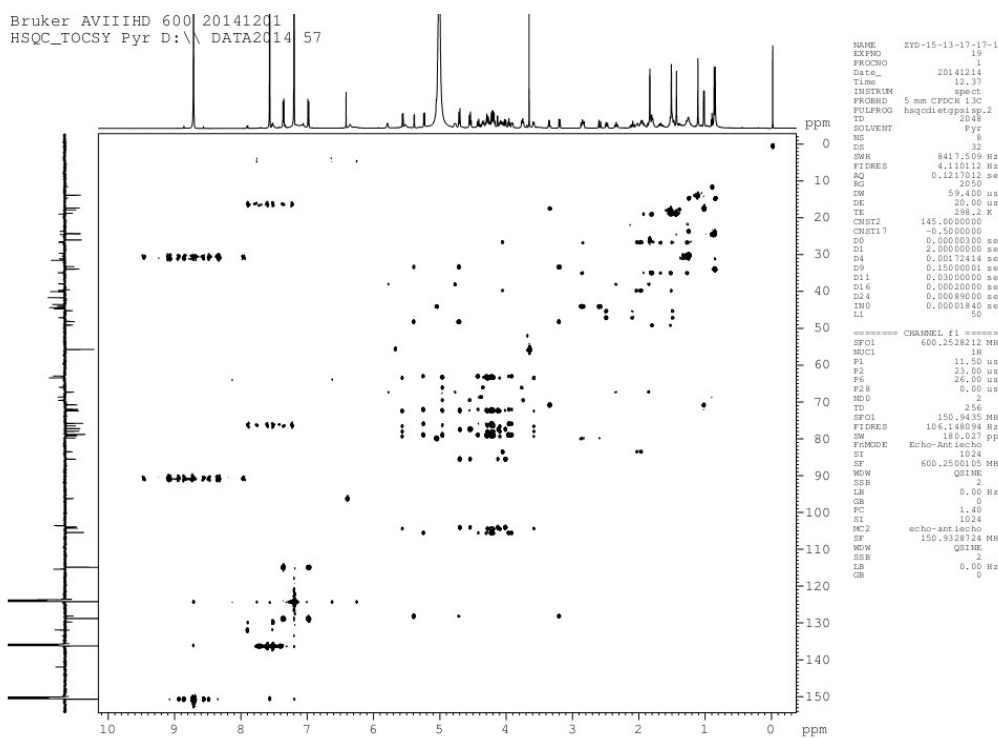

Figure S57. HSQC-TOCSY spectrum of **5** in Pyridine- $d_5$ .

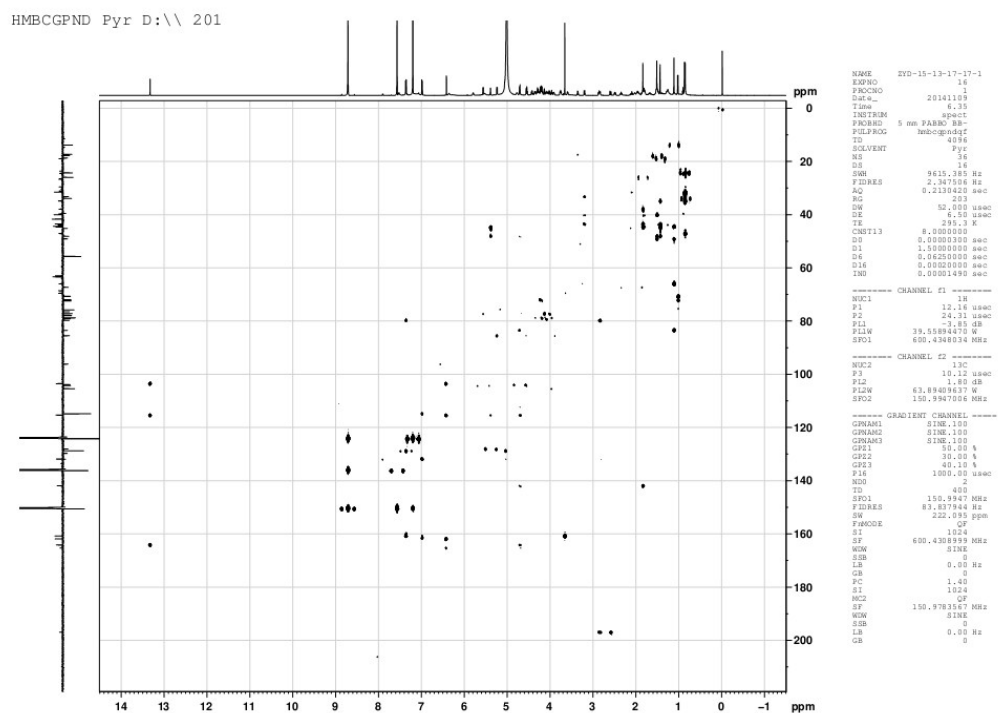

Figure S58. HMBC spectrum of **5** in Pyridine- $d_5$ .

COSYGMFSW Pyr D:\ 2

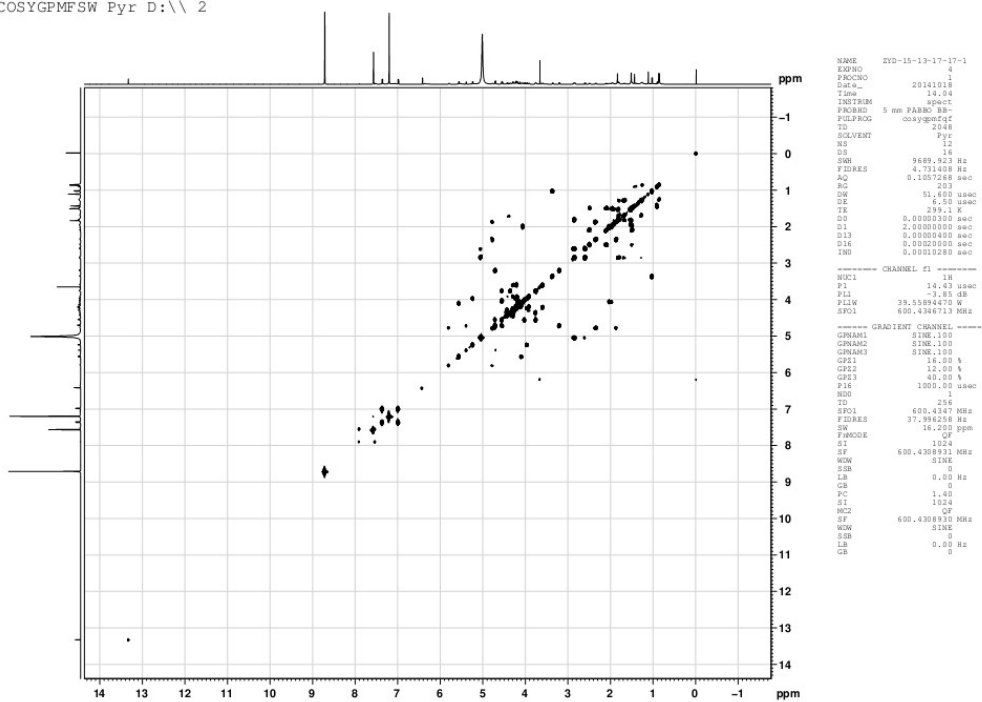

Figure S59. COSY spectrum of 5 in Pyridine- $d_5$ .

Bruker AVI1IHDD, 600 20141201  
TOCSY\_2D Pyr D:\ DATA2014 57

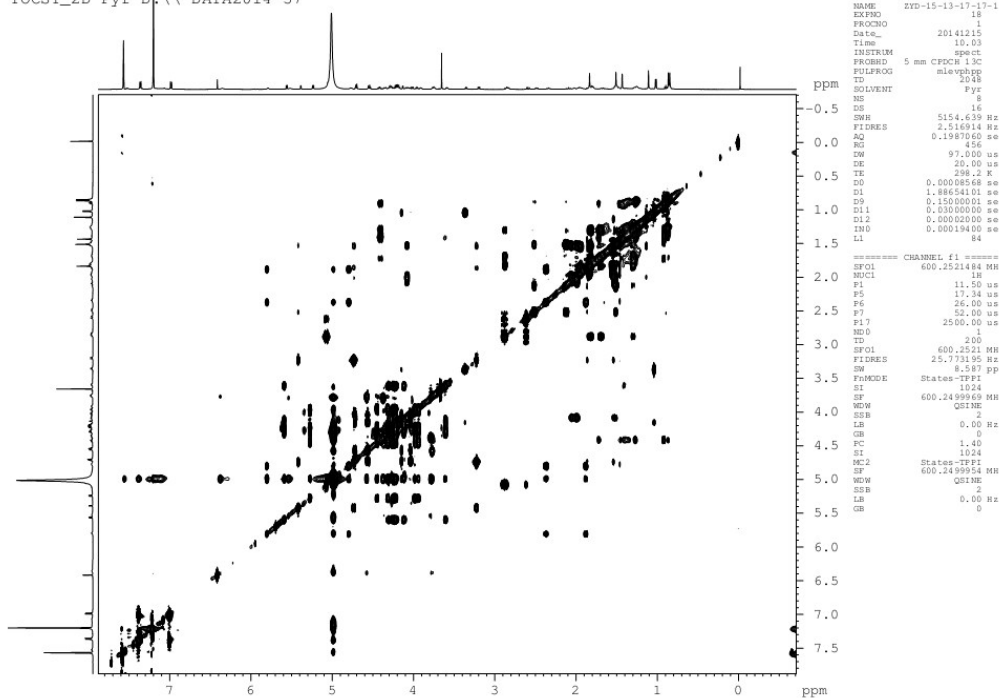

Figure S60. TOCSY spectrum of 5 in Pyridine- $d_5$ .

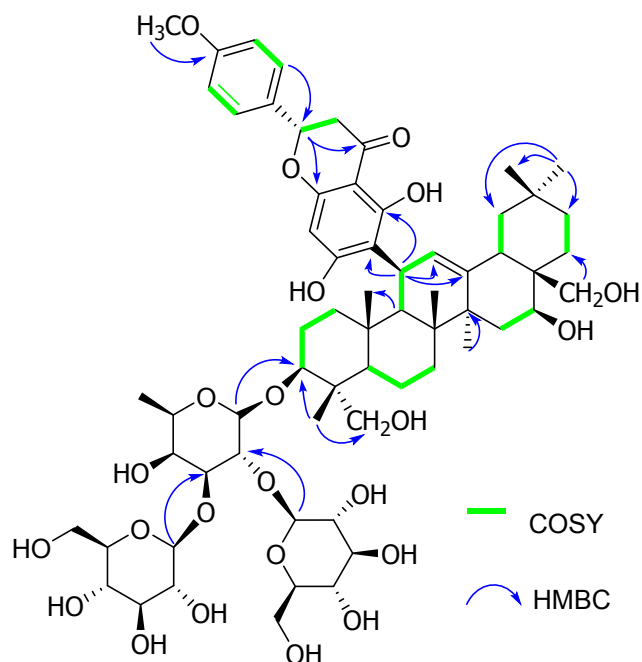

Figure S61. TOCSY and HMBC correlations of **5** in Pyridine-*d*<sub>5</sub>.

NOESYPSHW Pyr D:\ 20

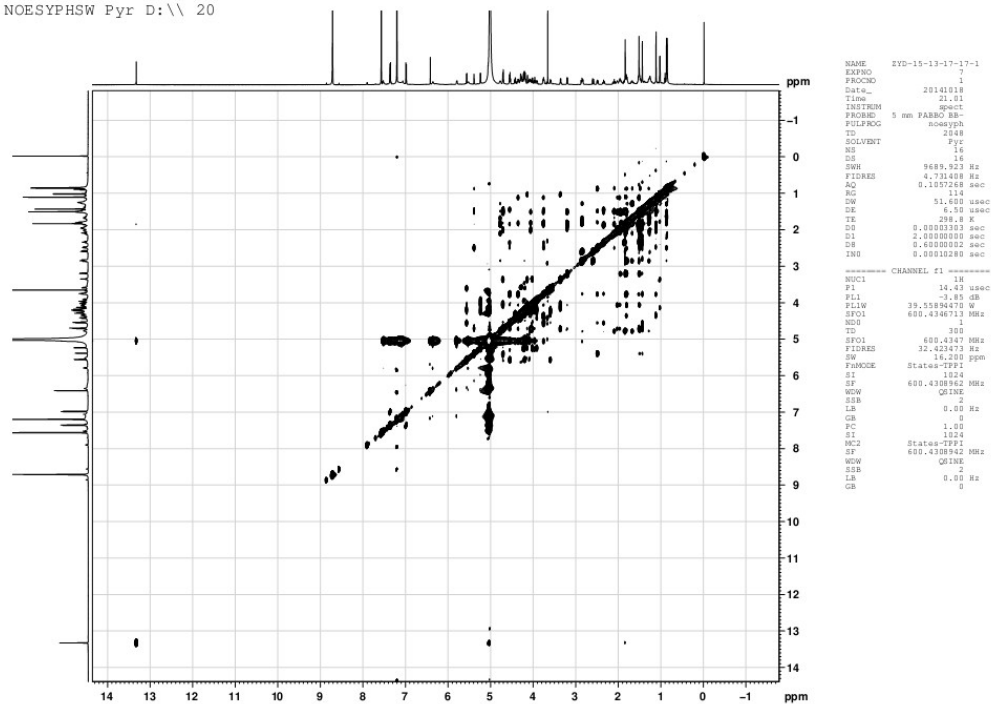

Figure S62. NOESY Spectrum of **5** in Pyridine-*d*<sub>5</sub>.



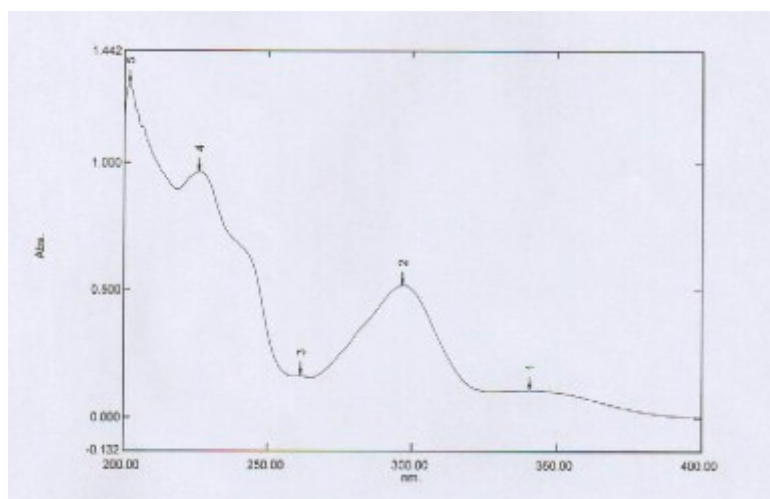

**Figure S63.** The experimental UV spectrum of **5**.

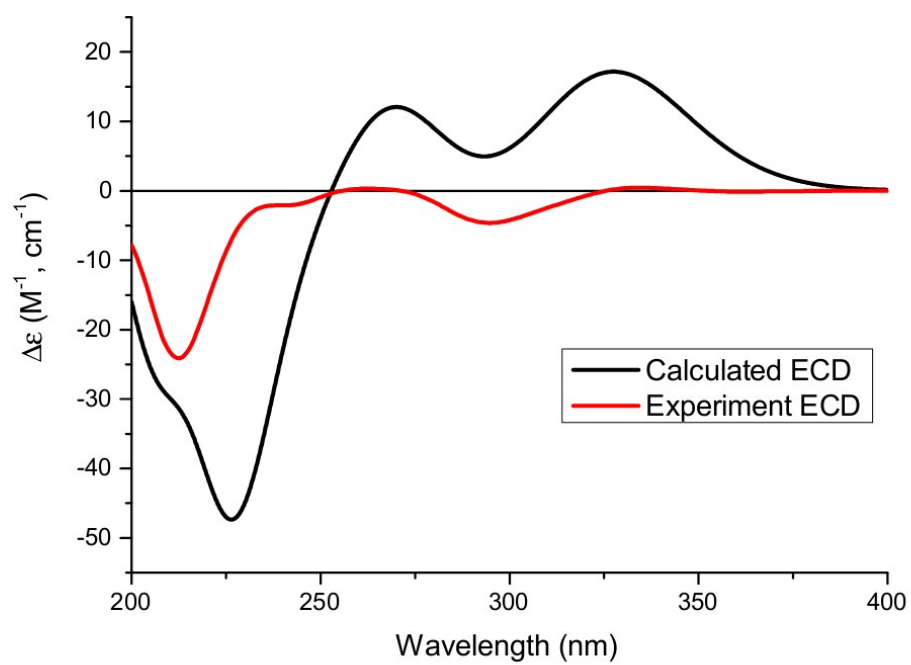

**Figure S64.** The experimental and calculated ECD spectra of **5**.

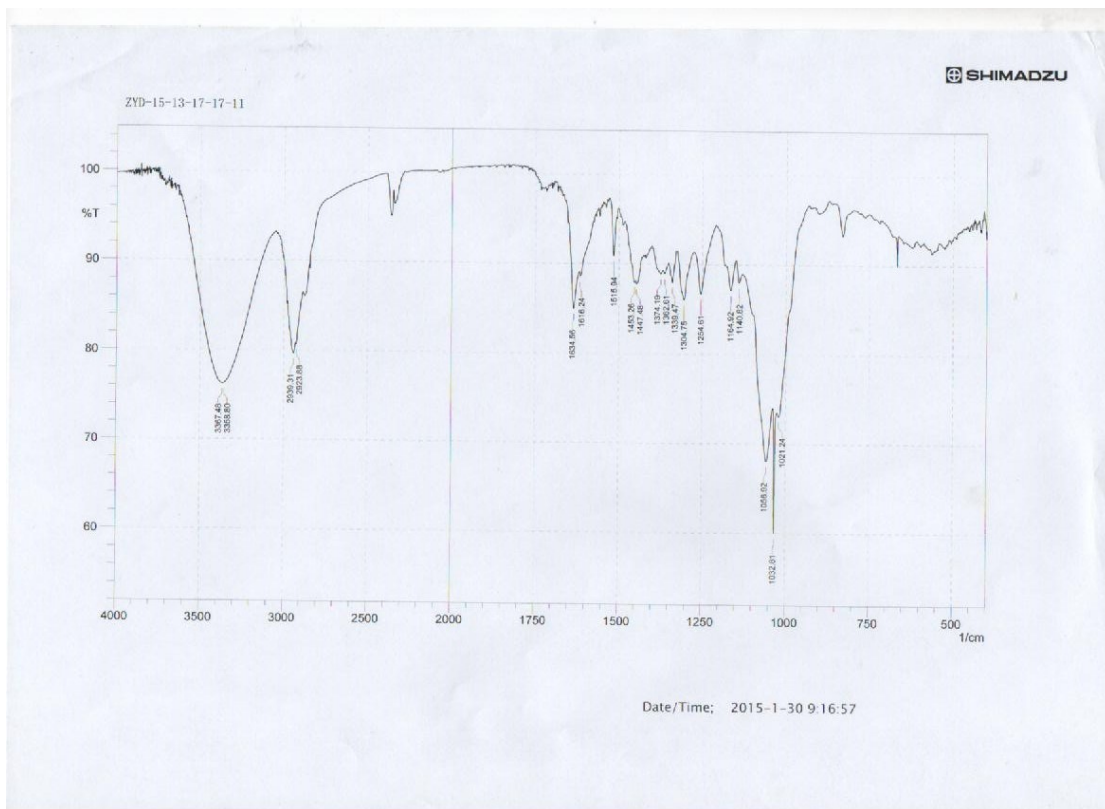

Figure S65. The IR spectrum of 5.

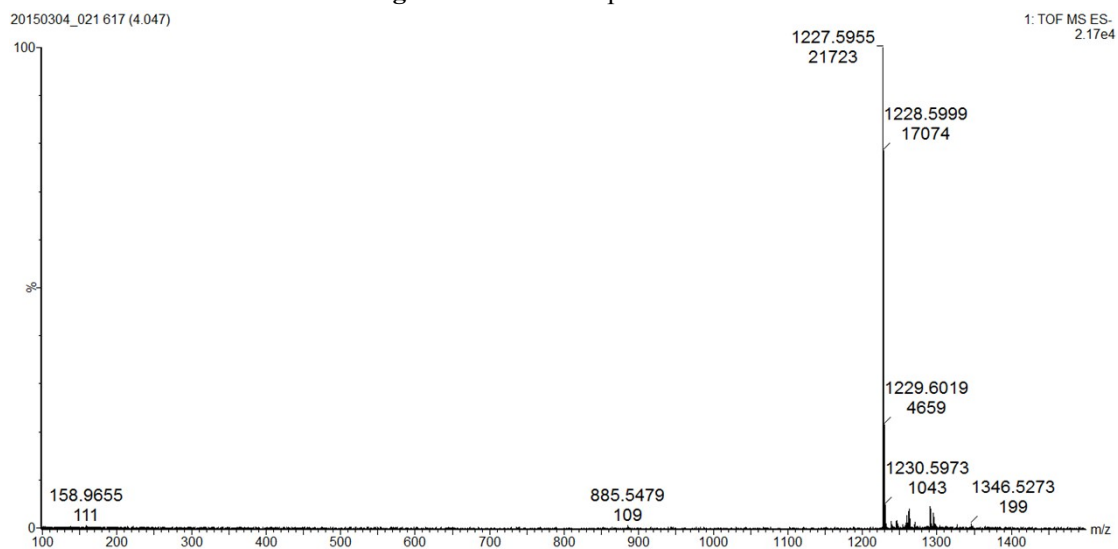

Figure S66. The HR-ESI-MS of 6.

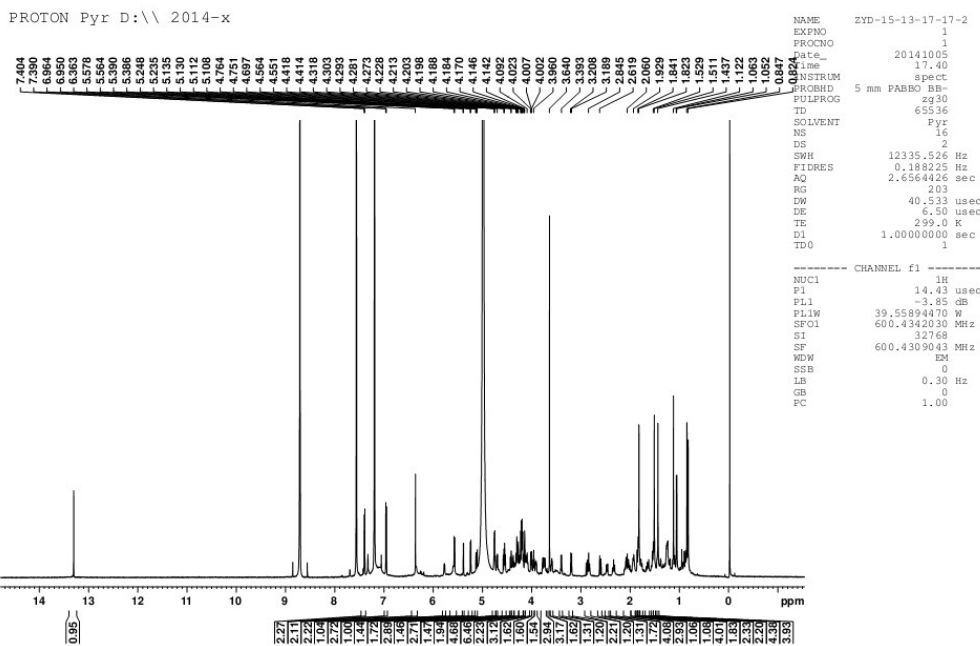

Figure S67. <sup>1</sup>H NMR spectrum of **6** in Pyridine-*d*<sub>5</sub>.

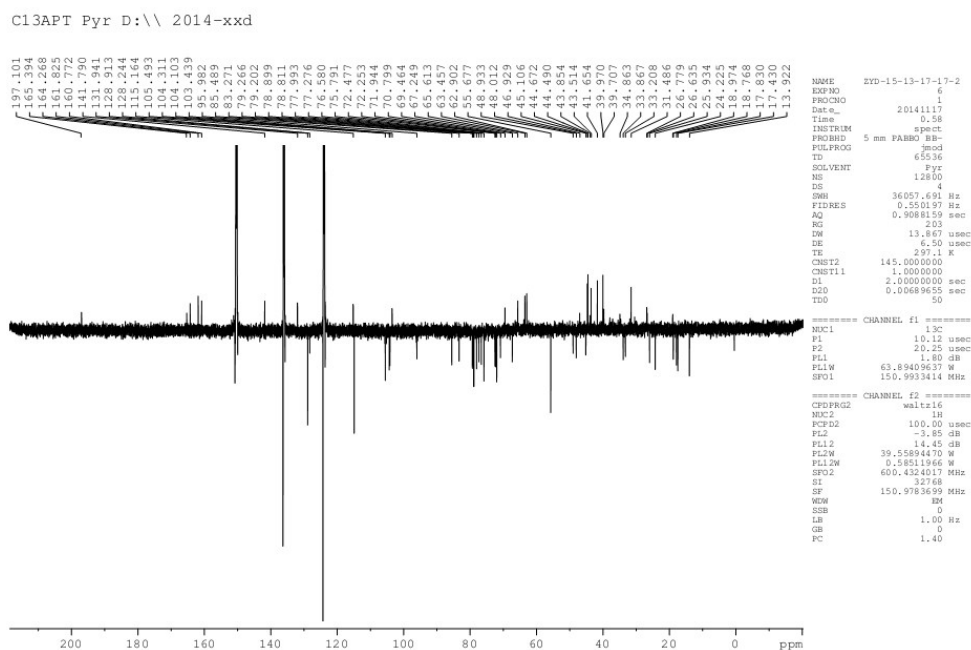

Figure S68. <sup>13</sup>C APT spectrum of **6** in Pyridine-*d*<sub>5</sub>.

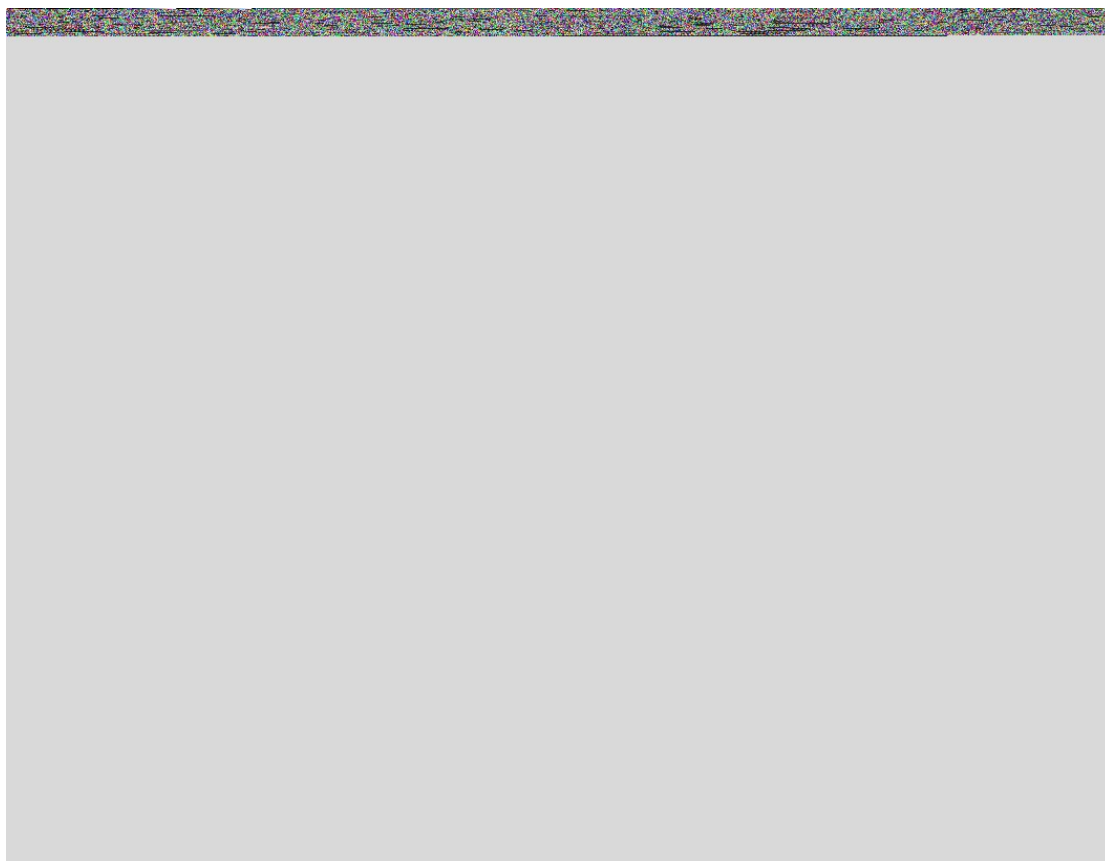

Figure S69. HSQC spectrum of 6 in Pyridine-*d*<sub>5</sub>.

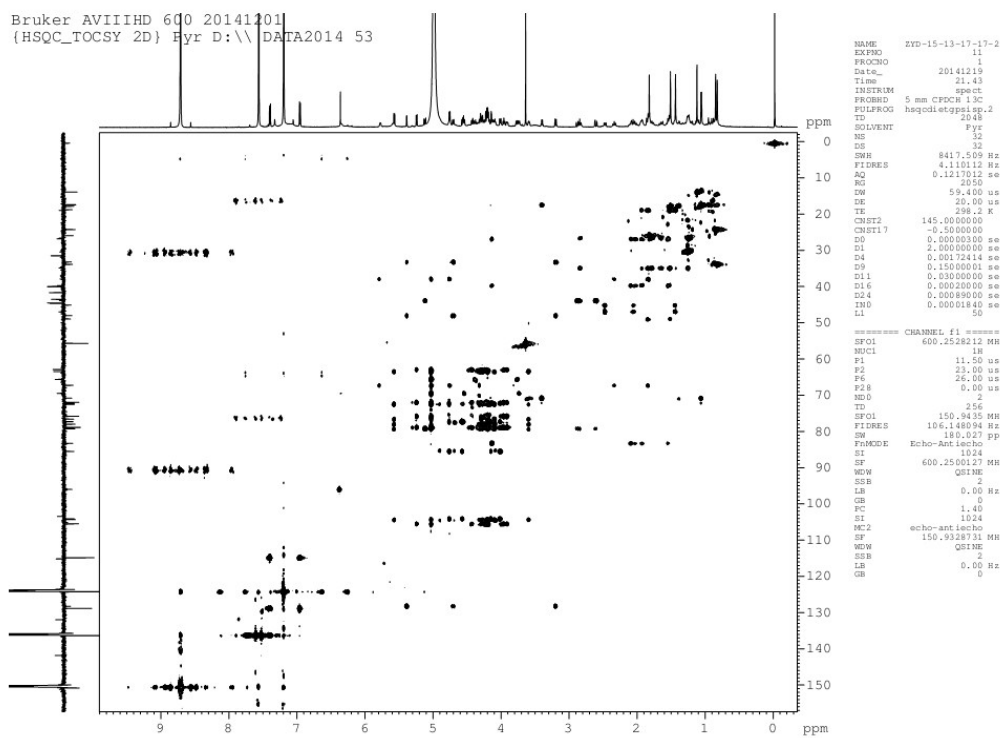

Figure S70. HSQC-TOCSY spectrum of 6 in Pyridine-*d*<sub>5</sub>.

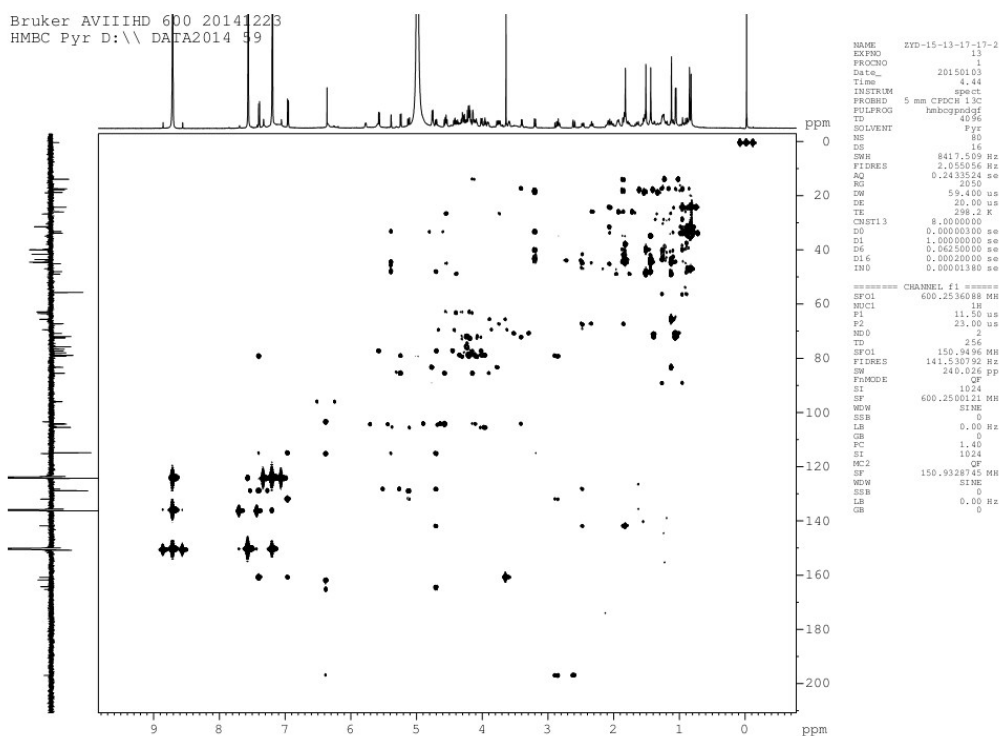

Figure S71. HMBC spectrum of 6 in Pyridine-*d*<sub>5</sub>.

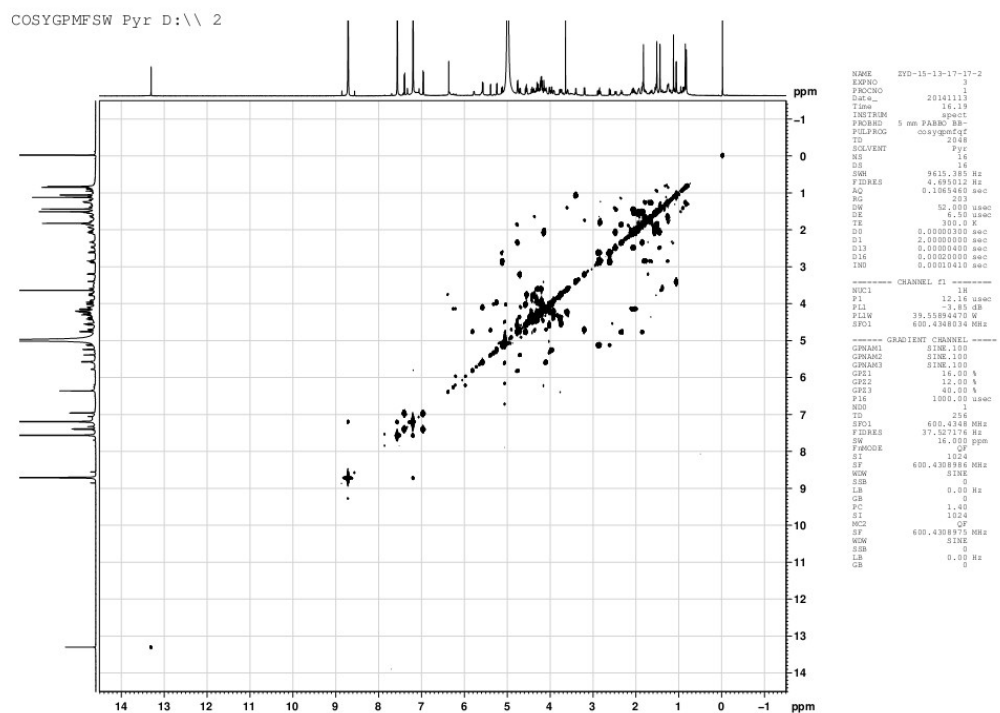

Figure S72. COSY spectrum of 6 in Pyridine-*d*<sub>5</sub>.



NOESYPSHW Pyr D:\\ 20

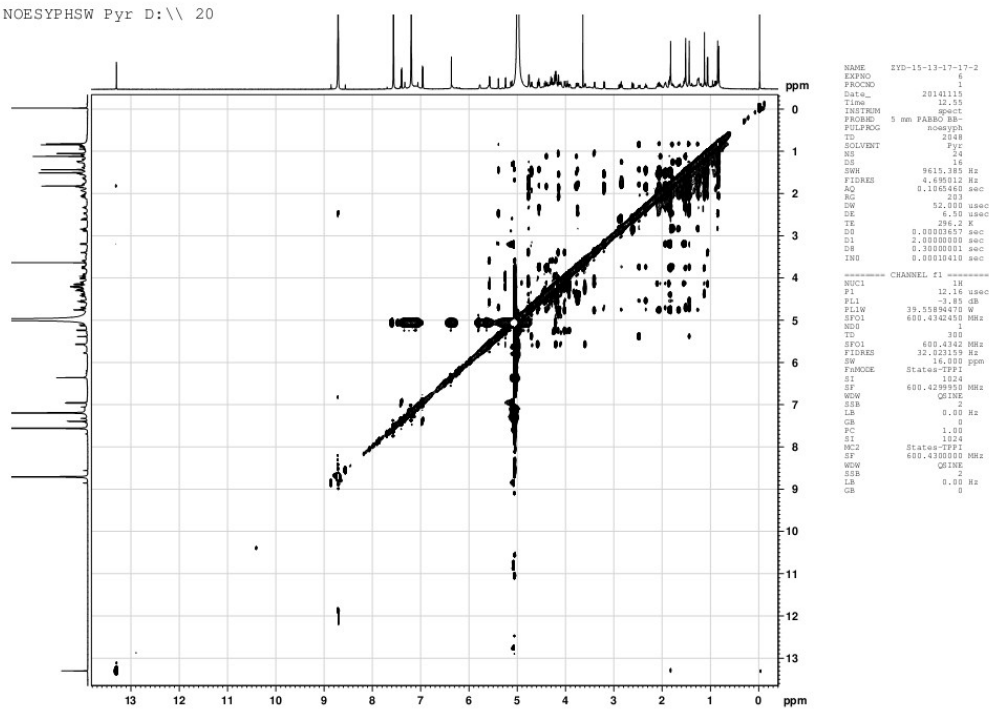

Figure S75. NOESY Spectrum of 6 in Pyridine- $d_5$ .

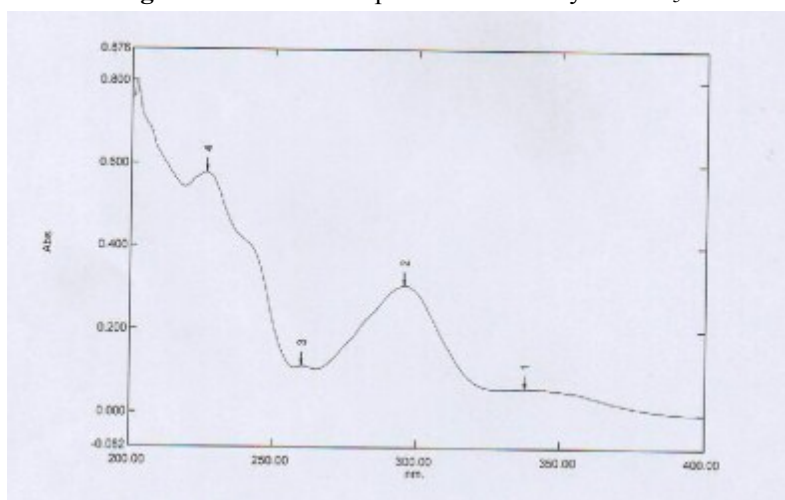

Figure S76. The experimental UV spectrum of 6.

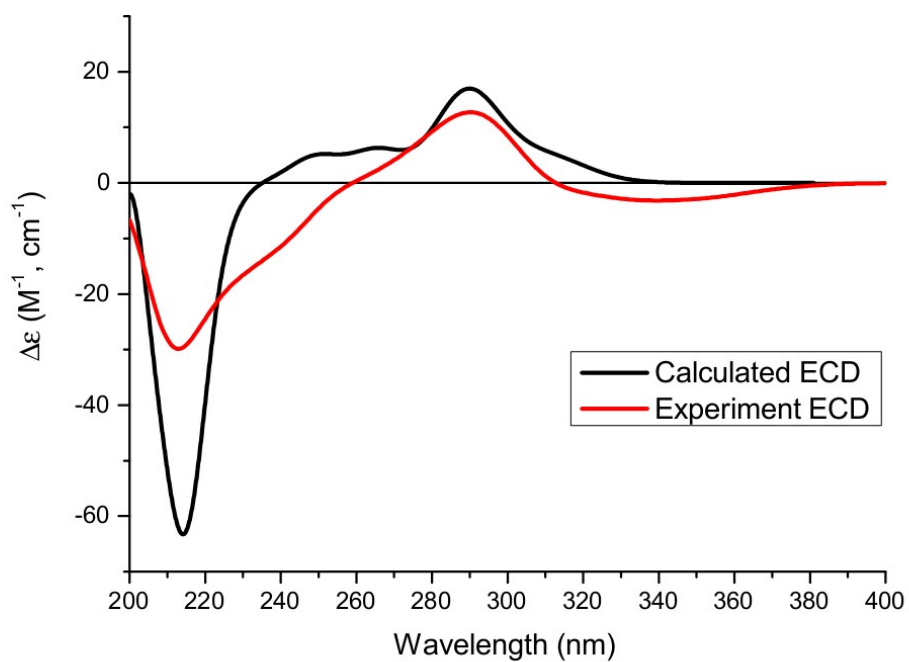

**Figure S77.** The experimental and calculated ECD spectra of **6**.

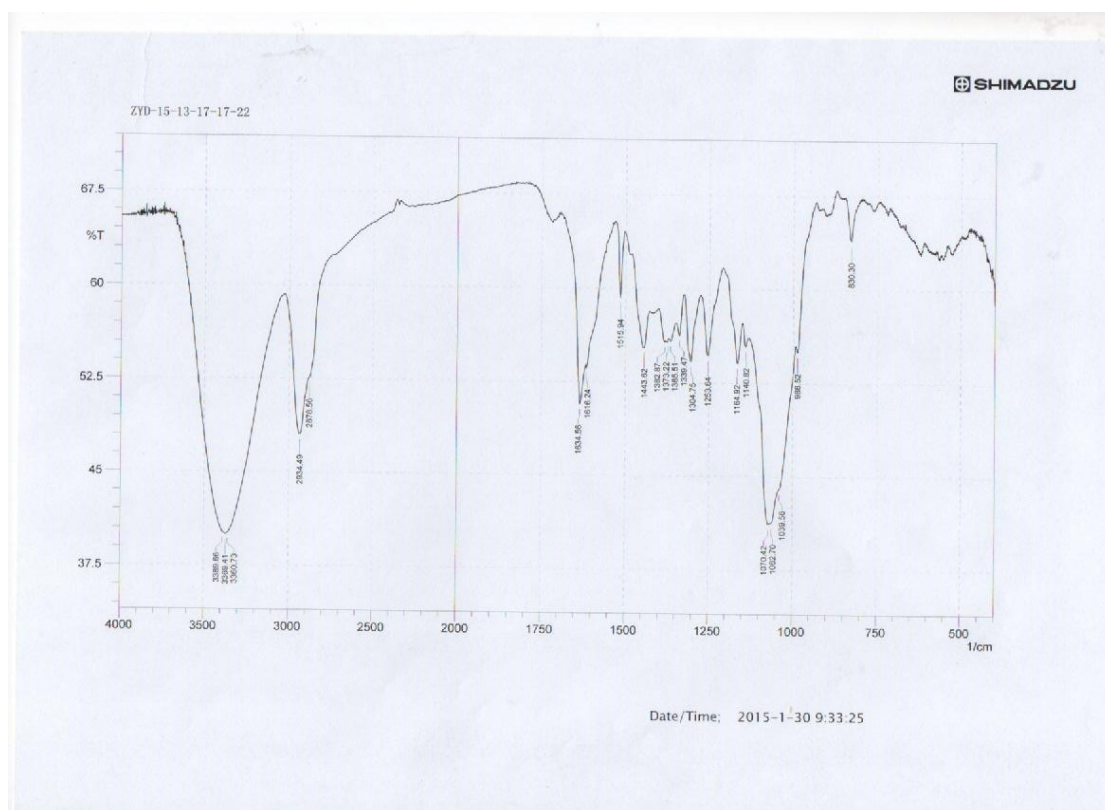

**Figure S78.** The IR spectrum of **6**.



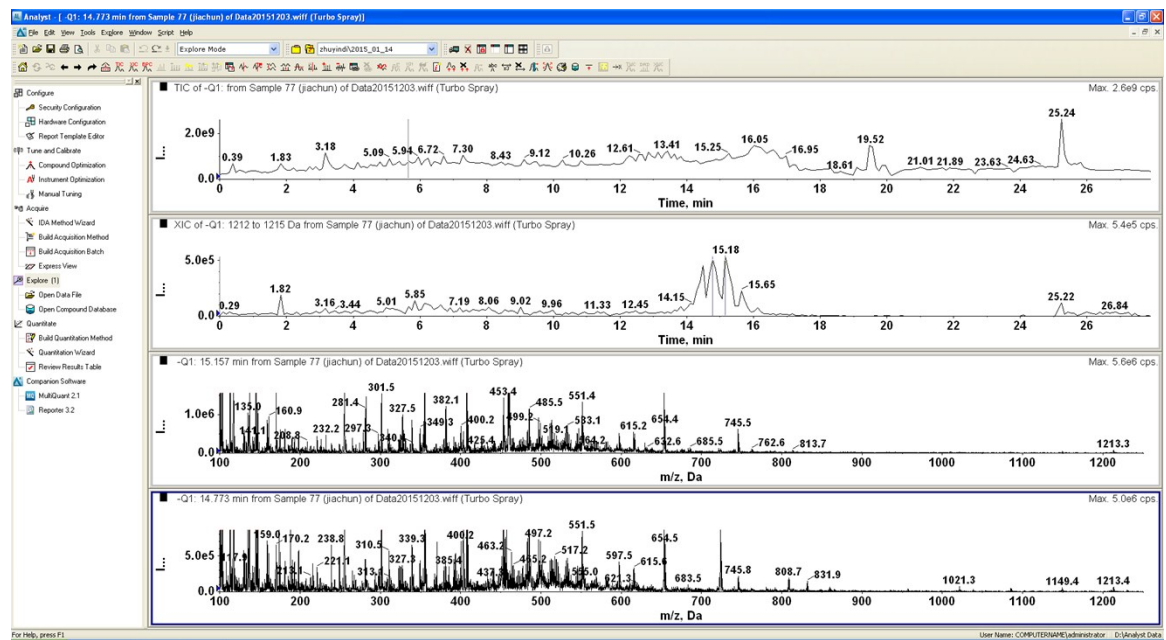

Figure S79. LC-ESI(-)MS chromatogram of methanol extract.
